# Supplementary material
Source: PubMed Central journal article supplement (PMC3276669)
Supplement: mmc1.pdf [file mmc1.pdf]

The American Journal of Human Genetics, Volume 90

## **Supplementary Data**

### **Age-Related Somatic Structural Changes**

#### **in the Nuclear Genome of Human Blood Cells**

**Lars A. Forsberg, Chiara Rasi, Hamid R. Razzaghian, Geeta Pakalapati, Lindsay Waite, Krista Stanton Thilbeault, Anna Ronowicz, Nathan E. Wineinger, Hemant K. Tiwari, Dorret Boomsma, Maxwell P. Westerman, Jennifer R. Harris, Robert Lyle, Magnus Essand, Fredrik Eriksson, Themistocles L. Assimes, Carlos Iribarren, Eric Strachan, Terrance P. O'Hanlon, Lisa G. Rider, Frederick W. Miller, Vilmantas Giedraitis, Lars Lannfelt, Martin Ingelsson, Arkadiusz Piotrowski, Nancy L. Pedersen, Devin Absher, and Jan P. Dumanski**

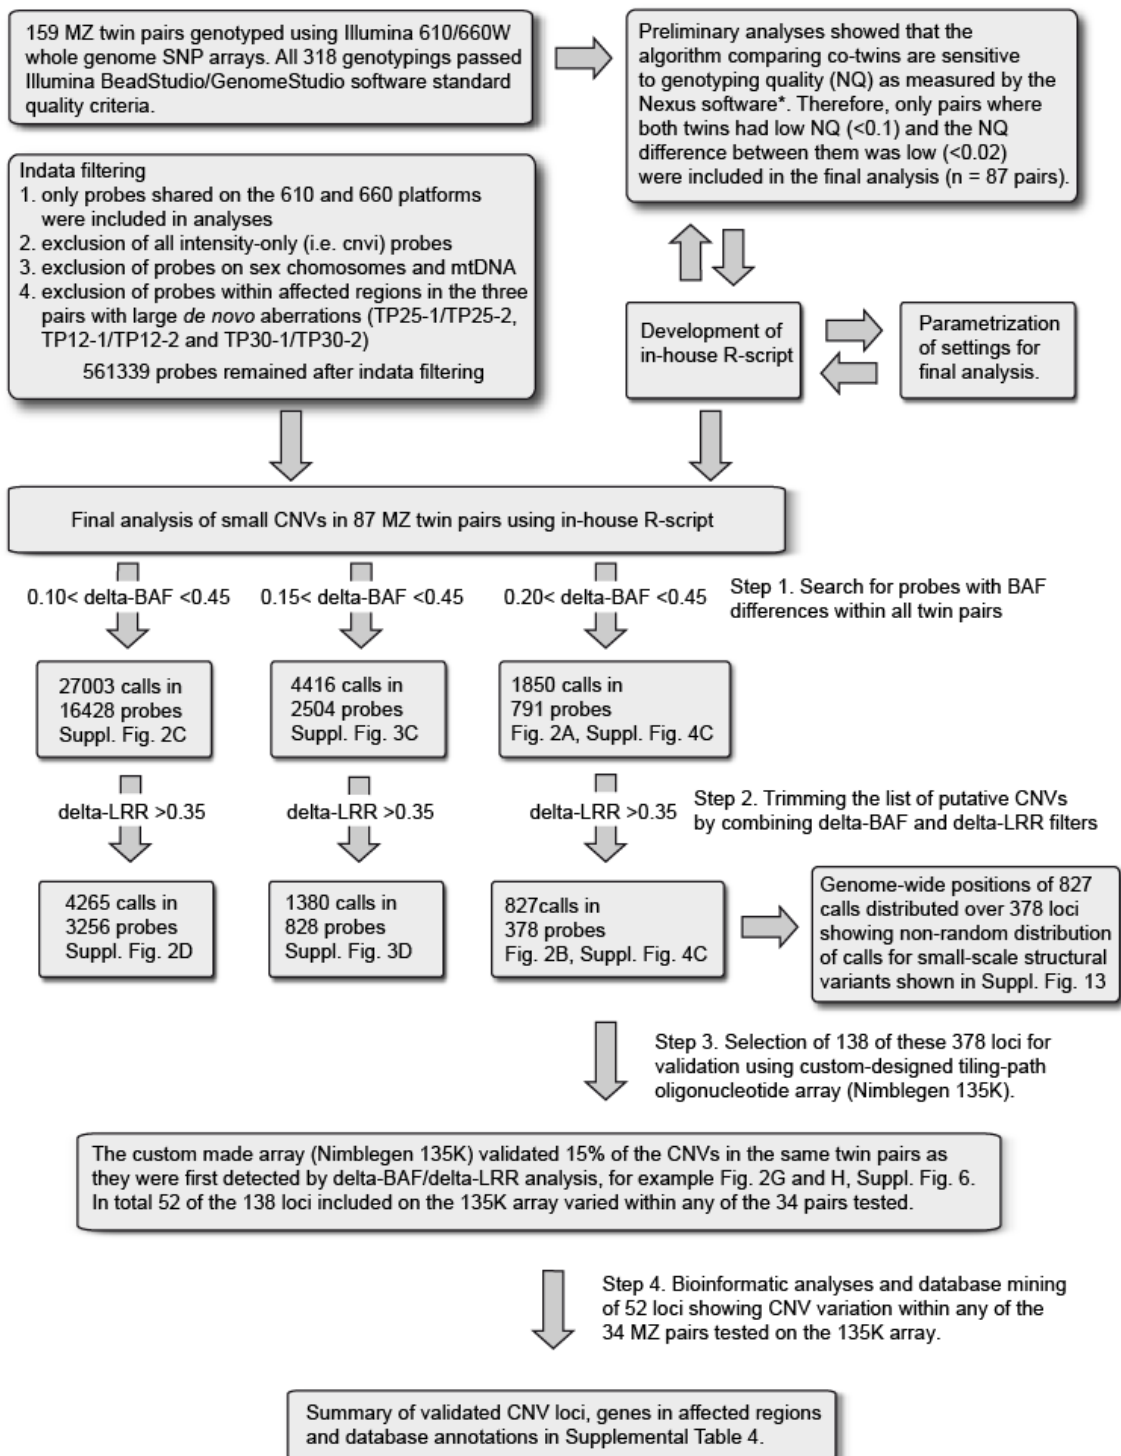

Figure S1. Flowchart Describing Analysis Pipeline for Small-Scale *de novo* Copy Number Variable (CNV) Loci using Cohorts of Age Stratified MZ Twins

By analyzing B-Allele Frequency (BAF) and Log R Ratio (LRR) from the Illumina SNP array analysis of 159 MZ twin pairs, we could identify and validate 52 CNV loci (Table S4). The analysis algorithm was developed in R version 2.12.0. Asterisk (\*) indicates Nexus Copy Number 5 Discovery Edition

program (BioDiscovery Inc., CA, USA), which was initially used for analysis of array-data. The Nexus quality score (i.e. NQ) is an estimate of statistical variance of the differences in the intensity data (LRR) of adjacent probes after removing 3% outlying values.

**A** Including probes in Mb-range aberrations

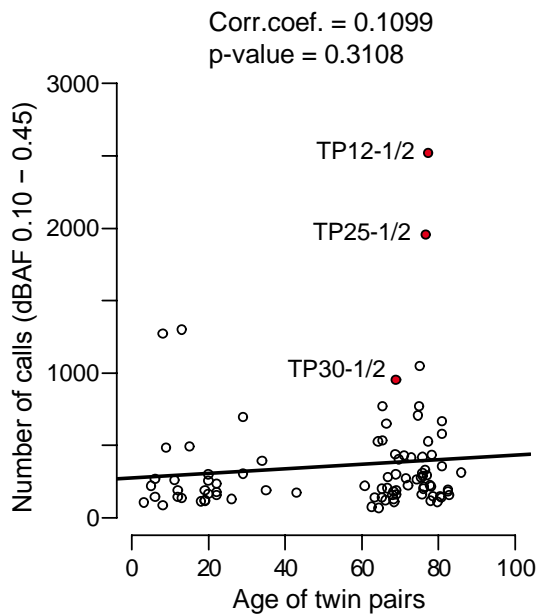

**B** Including probes in Mb-range aberrations

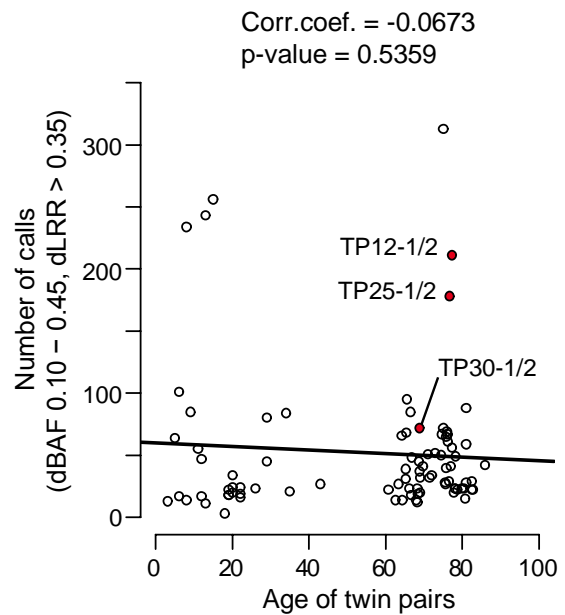

**C** Excluding probes in Mb-range aberrations

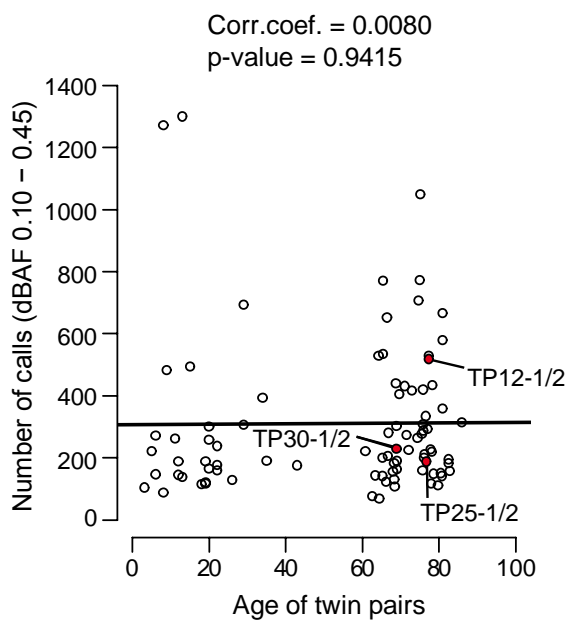

**D** Excluding probes in Mb-range aberrations

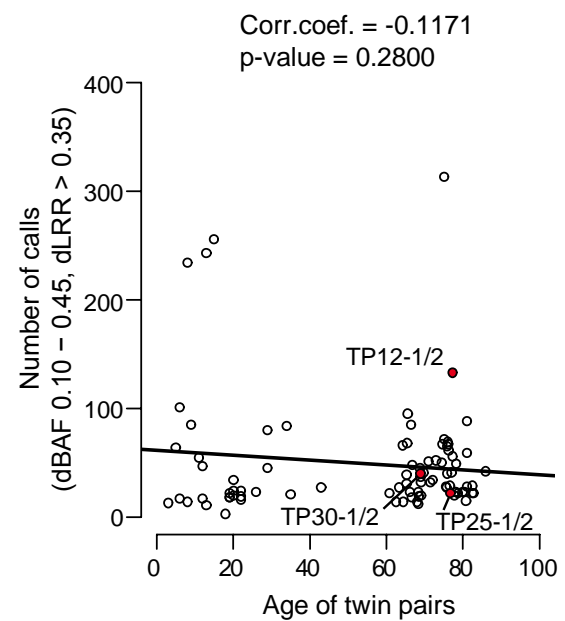

Figure S2. Testing of Filtering Parameters for Detection of Small Somatic Structural Rearrangements in 87 Pairs of MZ Twins using Delta-BAF Filter of 0.10 to 0.45

The settings applied in this version of the filter did not eliminate random noise in the data-set, when compared with the filter settings showed in Figures S3 and S4. Results in panels (A) and (B) are plotted including loci within three known large-scale de novo aberrations (red-dots; pair TP12-1/TP12-2 containing a terminal CNN-LOH, 76.47 Mb on 10q, pair TP25-1/TP25-2 with a 32.46 Mb deletion on 5q, and pair TP30-1/TP30-2 with a 12.91 Mb deletion on 20q) and in panels (C) and (D) the same data are plotted without the probes of these well-characterized and validated large-scale aberrations. These three MZ pairs were suitable internal controls, allowing testing of whether the filters at different settings were discerning the three large-scale aberrations, thus allowing us to test the sensitivity of the method (for more information see Figure S4). Supplemental Figures 3 and 4 have similar set-up with testing filters at different thresholds, with and without inclusion of probes located within the large aberrations. Panels (A) and (C) are showing data after filtering of intra-pair differences using delta-BAF filter only and panels (B) and (D) show results using delta-BAF in combination with delta-LRR filters. Each dot represents data from one MZ twin pair.

**A Including probes in Mb-range aberrations**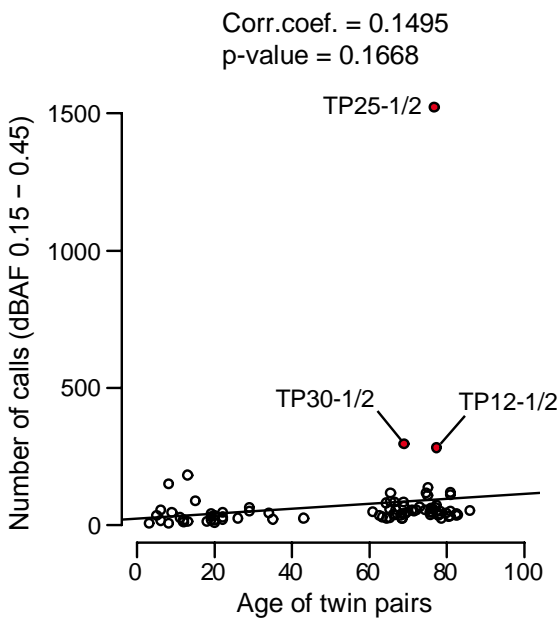**B Including probes in Mb-range aberrations**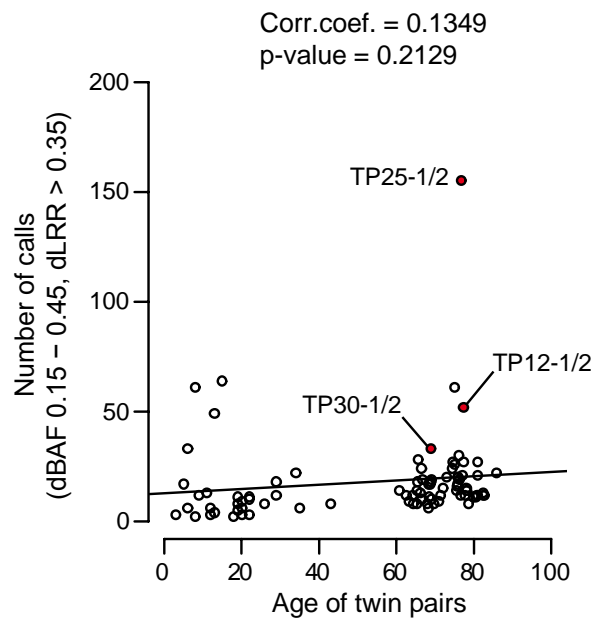**C Excluding probes in Mb-range aberrations**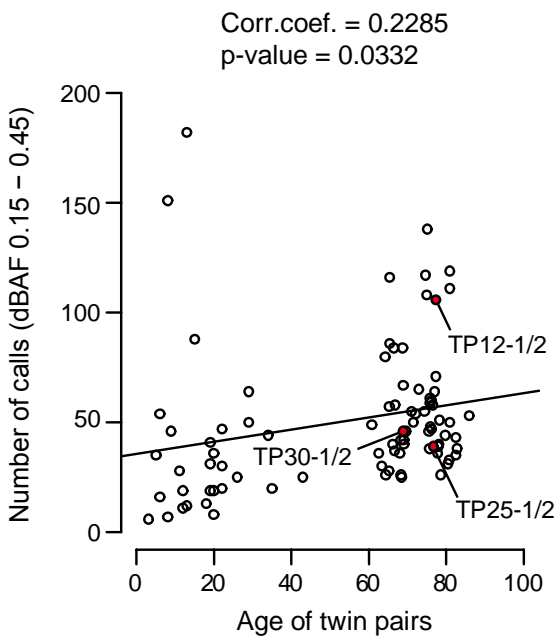**D Excluding probes in Mb-range aberrations**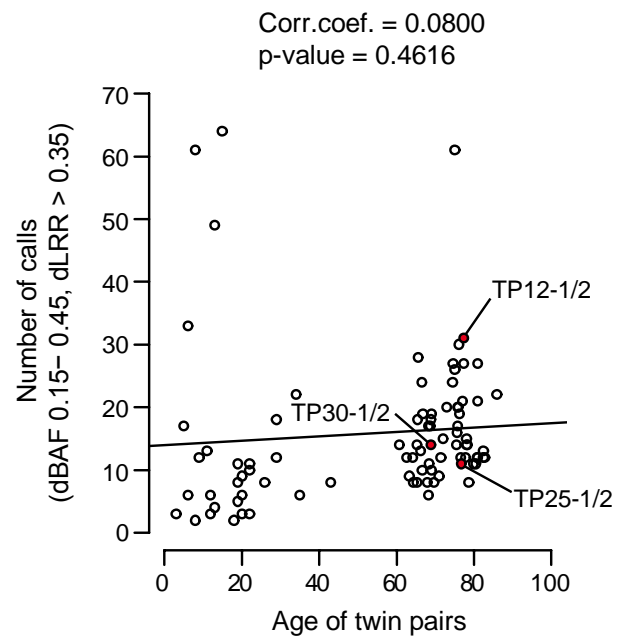

Figure S3. Testing of Filtering Parameters for Detection of Small Somatic Structural Rearrangements in 87 Pairs of MZ Twins using Delta-BAF Filter of 0.15 to 0.45

These settings filtered out random noise in a more efficient way as compared to 0.10 to 0.45 settings in Figure S2, but not to the same extent as 0.20 to 0.45 settings shown in Figure S4. This figure has a similar set up as Figures S2 and S4. Results in (A) and (B) are plotted including loci within three known large-scale de novo aberrations (red-dots; pair TP12-1/TP12-2 containing a terminal CNN-LOH of 76.47 Mb on 10q, pair TP25-1/TP25-2 with a 32.46 Mb deletion on 5q, and pair TP30-1/TP30-

2 with a 12.91 Mb deletion on 20q) and in panels (C) and (D) the same data are plotted without the probes for these known aberrations (for more information see Figure S4). Panels (A) and (C) are showing data after filtering of intra-pair differences using delta-BAF filter only and panels (B) and (D) show results using delta-BAF in combination with delta-LRR filters. Each dot represents data from one MZ twin pair.

**A** Including probes in Mb-range aberrations

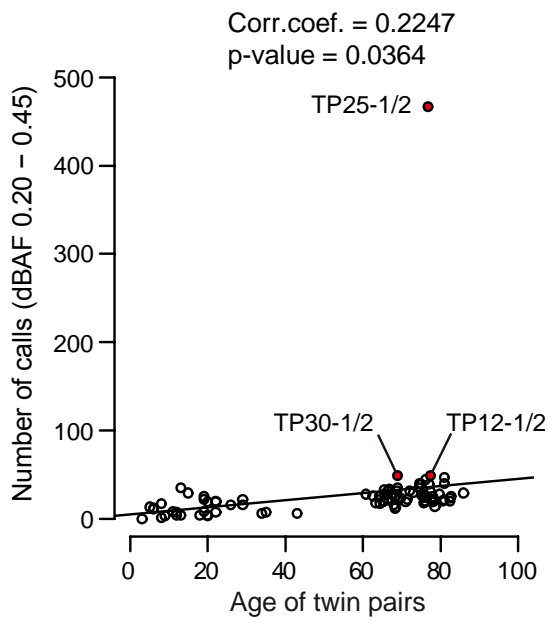

**B** Including probes in Mb-range aberrations

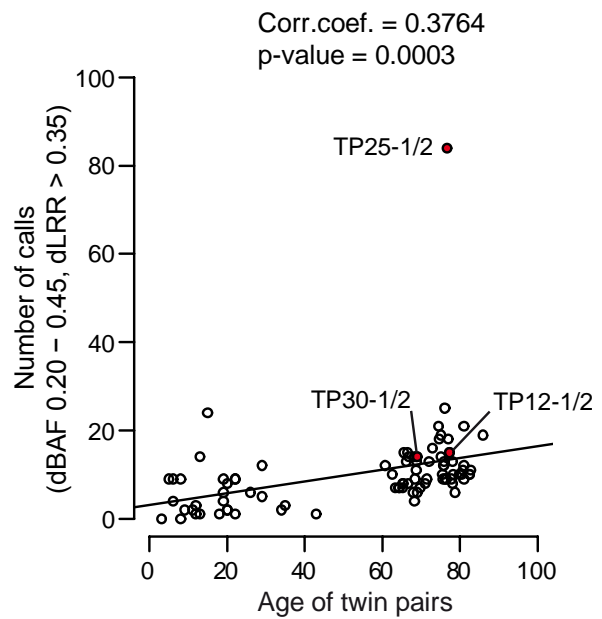

**C** Excluding probes in Mb-range aberrations

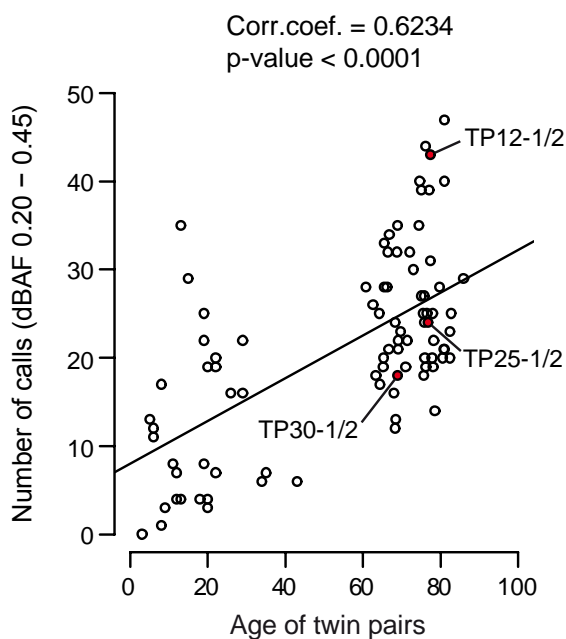

**D** Excluding probes in Mb-range aberrations

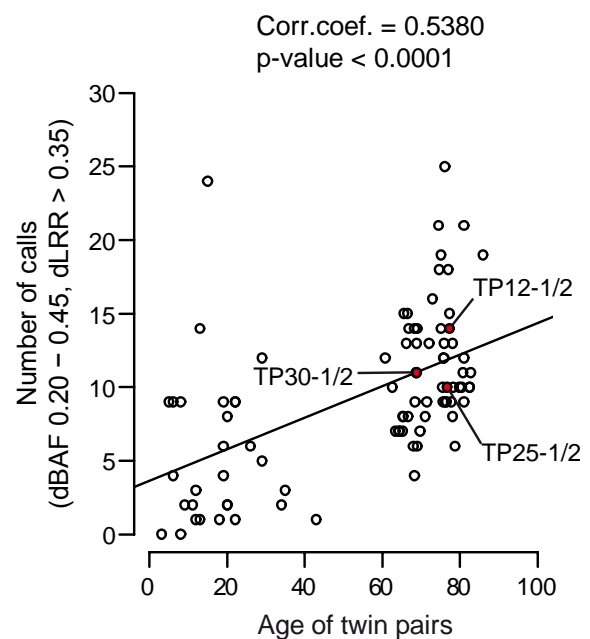

Figure S4. Testing of Filtering Parameters for the Detection of Small Somatic Structural Rearrangements in 87 Pairs of MZ Twins using Delta-BAF Filter of 0.20 to 0.45

These settings filtered out random noise in the most optimal way, when compared to settings in Figures S2 and S3. Each dot represents data from one MZ twin pair and panels (A) and (C) show intra-pair differences using the delta-BAF filter only, while panels (B) and (D) show data using delta-BAF in combination with delta-LRR filters. Results in (A) and (B) are plotted including loci within three known large-scale de novo aberrations (red-dots; pair TP12-1/TP12-2 containing a terminal CNN-LOH of 76.47 Mb on 10q, pair TP25-1/TP25-2 with a 32.46 Mb deletion on 5q, and pair TP30-1/TP30-2 with a 12.91 Mb deletion on 20q) and in panels (C) and (D) the same data are plotted without the probes in these known aberrations. These three MZ pairs are suitable internal controls, allowing testing of whether the filters at different settings were discerning the three large-scale aberrations, thus allowing us to test the sensitivity of the pipeline shown in Figure S1. The filter setting “delta-BAF 0.20 to 0.45” with inclusion of probes in the three large scale aberrations is identifying CNVs in all three cases (A). Twin TP25-2 has the highest proportion of cells (50.5%) with CNV and the deletion is very large (32.46 Mb) in size. This pair is therefore showing significantly larger number of calls, when compared with the other twin pair containing deletion (TP30-1/TP30-2, 12.91 Mb). This latter twin pair is, however, at the top of the cloud of calls in panel (A). The level of deletion in twin TP30-1 is estimated to 41.5% of cells affected with one copy loss. In summary, these results are in agreement with the qPCR validation for deletions in twin TP30-1 and twin TP25-2 (Figure 5). Data shown here in panels (C) and (D) are also shown in Figure 2, panels (A) and (B), respectively.

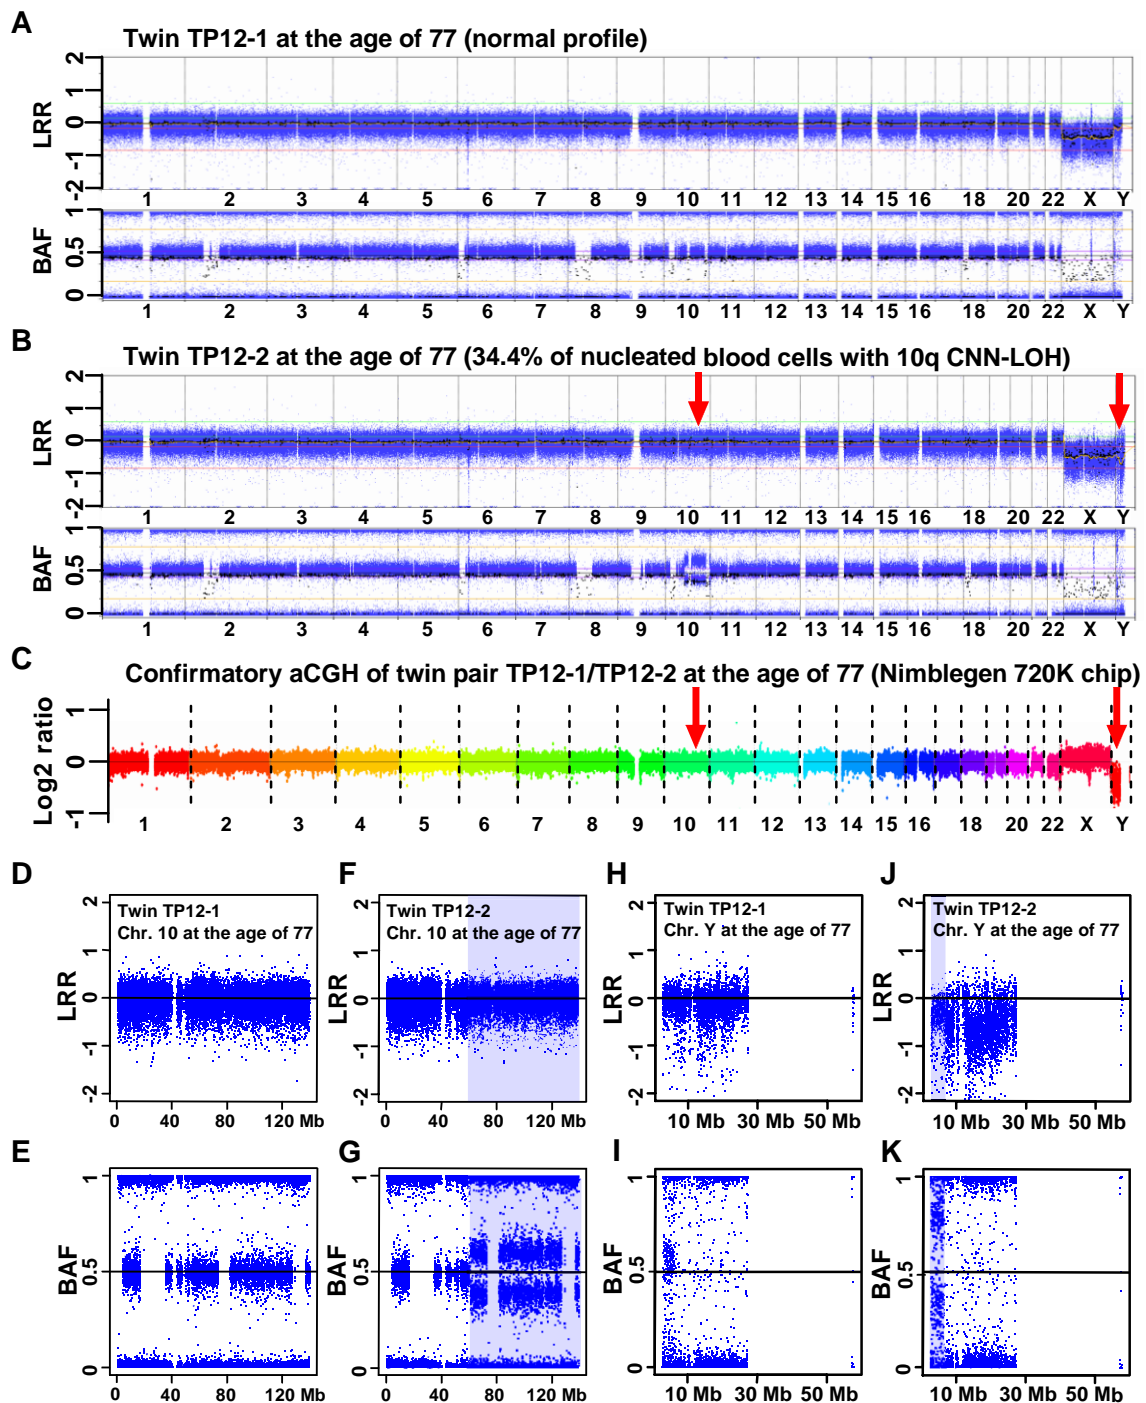

Figure S5. Two Large-Scale Genetic Aberrations Found in a 77-Year-Old MZ Twin TP12-2 using the Illumina SNP Array

Twin TP12-1 shows a normal copy number profile (A, D, and E). Using B-Allele Frequency (BAF) a 76.5 Mb large copy number neutral loss of heterozygosity (CNN-LOH) was identified on 10q in co-twin TP12-2 (B, F, and G). Quantification of cells containing the CNN-LOH using the MAD package suggests that 34.4% of cells were affected. As expected, comparative genomic hybridization array (aCGH) could not detect this copy number neutral aberration (C). However, the TP12-2 twin also showed a monosomy of chromosome Y in a proportion of cells (B, J, and K) and this CNV was



confirmed using aCGH (C). Three Illumina platforms (600K, 1M-Duo and 1M Omni) were used in the primary detection and validation of the results from this twin pair (details not shown).

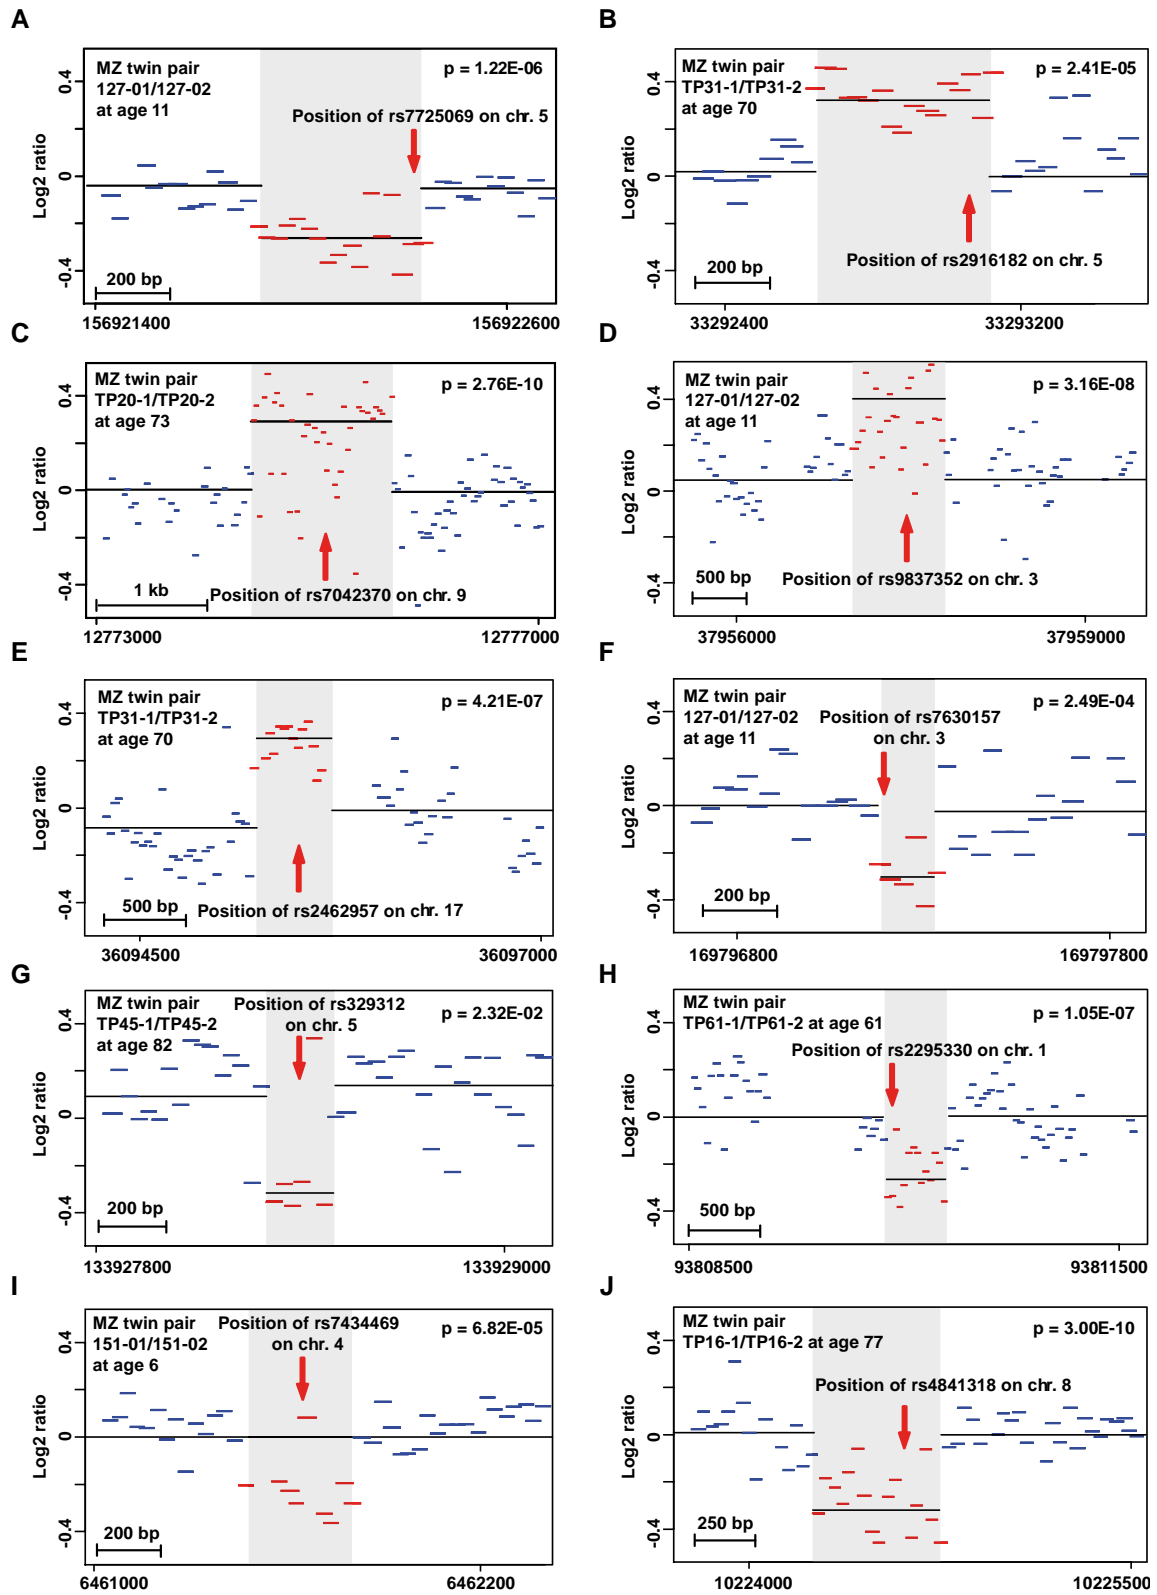

Figure S6 (1/2)

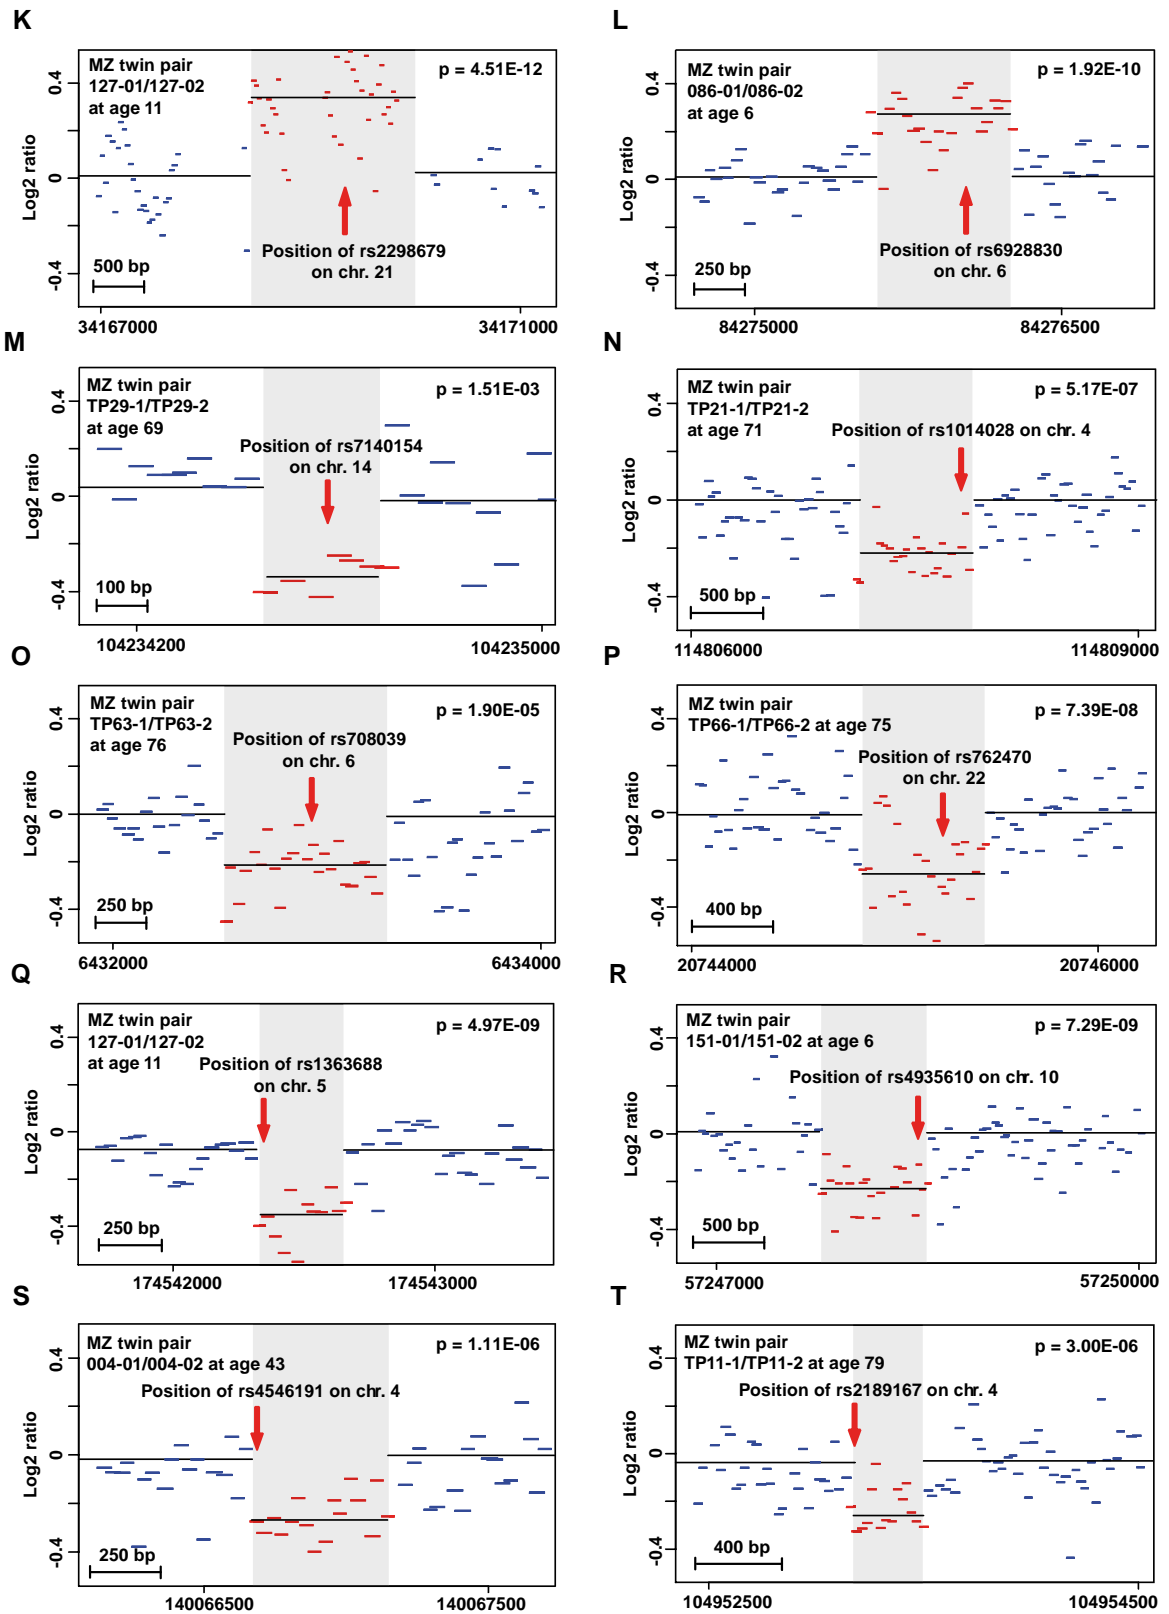

Figure S6 (2/2)

Figure S6.

Validation of small-scale putative CNVs by array-comparative genomic hybridization using custom-made maximum-resolution tiling-path oligonucleotide array (Nimblegen 135K) using co-twins (A–T). Statistical significance for the results from the Nimblegen array was calculated using the Mann-Whitney U-test, analyzing values for region of interest (shaded) and on both sides flanking control regions. By co-hybridization of monozygotic twins we could successfully validate 52 (38%) loci displaying putative small-scale CNVs. The custom-made 135K Nimblegen array consisted of 137545 probes, which were used to validate the 138 putative CNV loci detected by the Illumina SNP array (Figure 2B and Figures S1 and S4D). In total, the design consisted of 98894 experimental probes (covering the chromosomal windows shown in Table S4) and an additional 38651 backbone control probes evenly distributed across the whole genome. Probe sequence length varied according to Nimblegen recommendations between 50 and 75 bps and the median overlap of probes (i.e. probe spacing) was 30 bps. The rate of validation success was not different in the young (n=8) and old (n=26) MZ pairs used in these experiments (t-test,  $t=0.7062$ ,  $p\text{-value}=0.4819$ ), supporting the results from linear regression analyses in Figure 2B and Figure S4D.

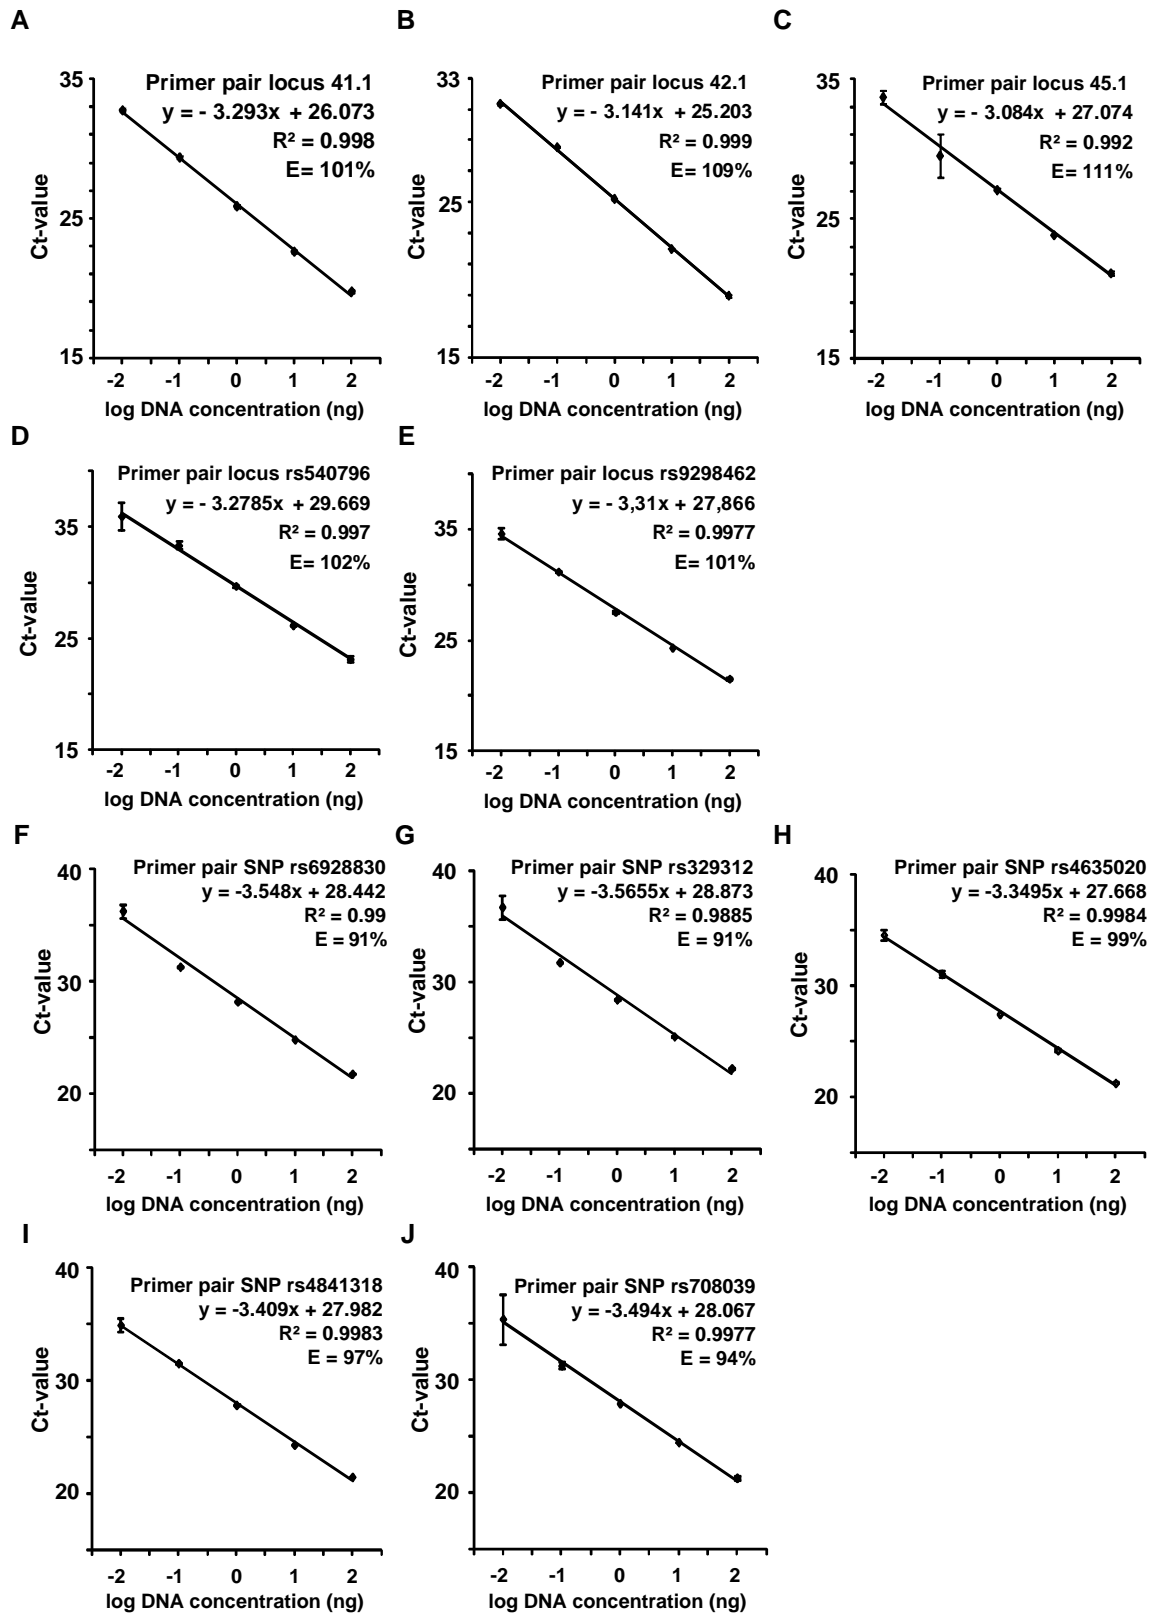

### Figure S7. Primer Efficiency of the Primer Pairs Used in the qPCR Experiments

The standard curve of each primer pair and their efficiencies are given in panels A–J. For each primer pair a standard curve was generated by first performing PCR reactions with five known concentrations of control DNA (normal human female genomic DNA; Promega Corporation, Madison, WI, USA). The standard curves were generated by plotting the Ct (Cycle threshold) values from these reactions versus the log DNA concentration of the control DNA. PCR reactions for each DNA concentration were replicated and each point represents the average of Ct values from these reactions. Error bars represents standard deviations from the mean and the PCR efficiency was calculated as:  $E=10^{(-1/\text{slope})-1}$ .

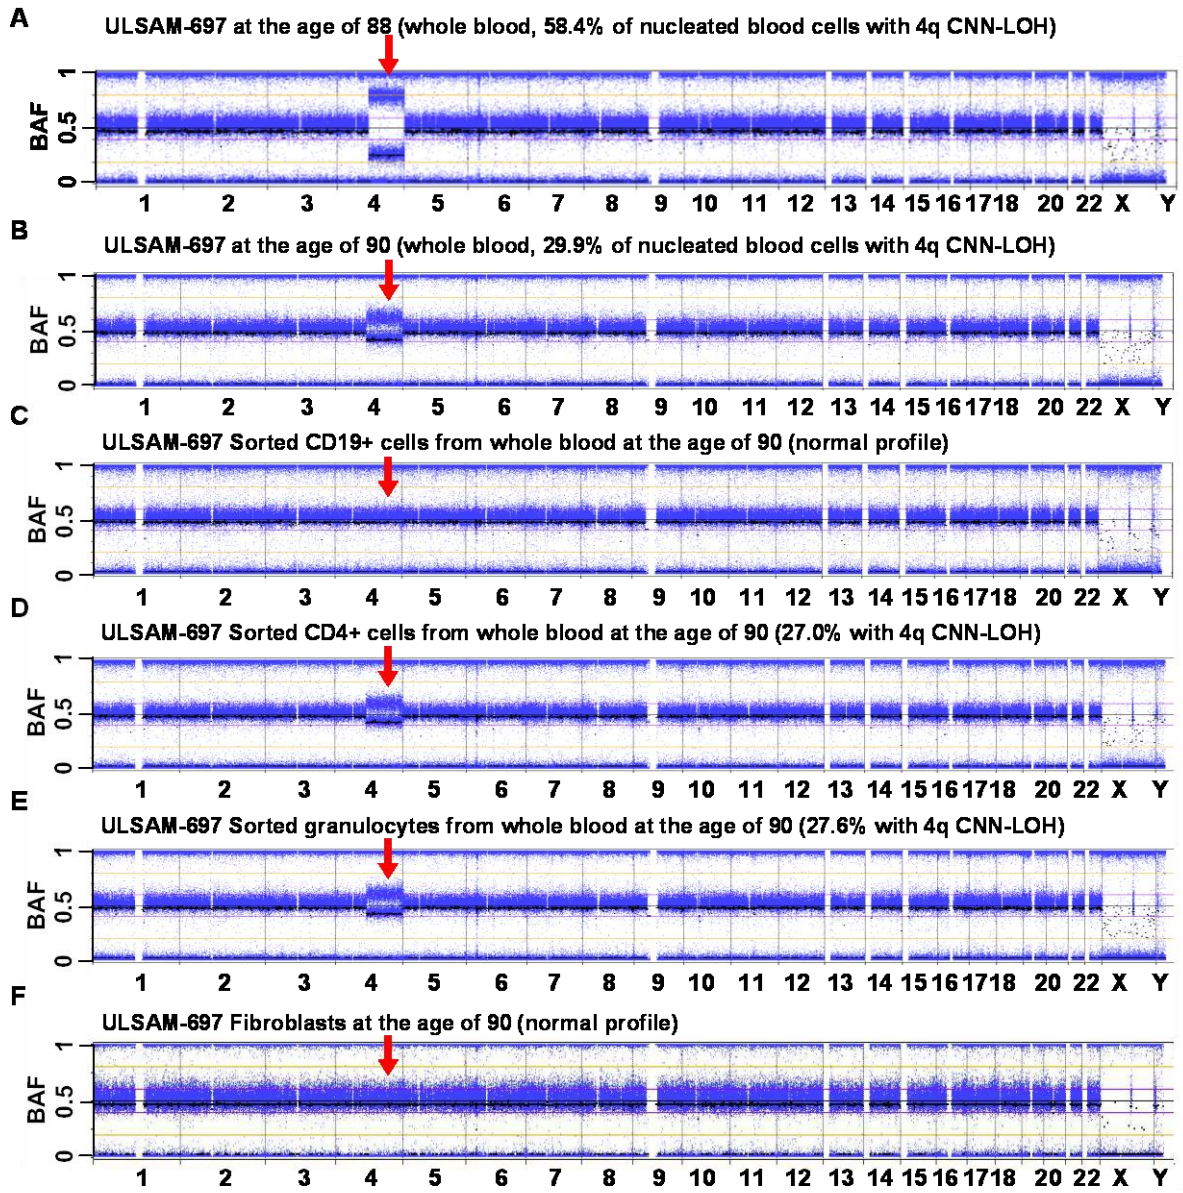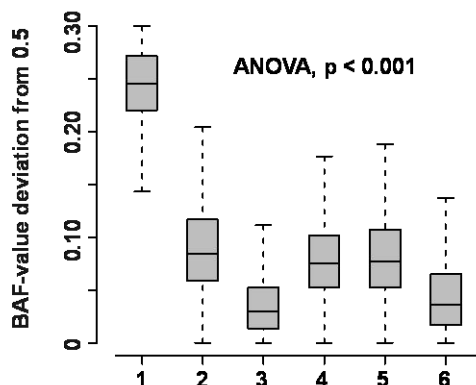

**Proportion of cells with 4q CNN-LOH in ULSAM-697**

1. Whole blood at the age of 88 = 57.8%
2. Whole blood at the age of 90 = 29.9%
3. CD19+ cells from blood at the age of 90 = 0%
4. CD4+ cells from blood at the age of 90 = 27.0%
5. Granulocytes from blood at the age of 90 = 27.6%
6. Fibroblasts at the age of 90 = 0%

Figure S8. Somatic Event in Sorted Subsets of Blood Cells in the Single-Born ULSAM-697 Subject

A large terminal copy number neutral loss of heterozygosity (CNN-LOH) encompassing 103 Mb of 4q of somatic origin was first detected in the blood sample drawn at 88 years of age, using B-Allele Frequency (BAF) from Illumina SNP array genotyping Panel (A) (see also Figures 1G–1K). Analysis of Illumina data using R-package MAD suggest 58.4% aberrant cells at the age of 88. The subject was re-sampled at the age of 90, when both peripheral blood and a skin biopsy was obtained. The latter was used for short-term culture of fibroblasts. From peripheral blood we sorted CD4<sup>+</sup>, CD19<sup>+</sup> cells and granulocytes using standard protocols. When comparing whole blood at 88 and 90 years of age, the proportion of cells with CNN-LOH had decreased substantially in only two years (A, B, and G), from 57.8 to 29.9% according to the MAD-estimates. As expected, the fibroblasts sampled as control shows a normal BAF profile without the aberration (F and G). Results from different types of sorted blood cells at the age of 90 showed unexpected results (C–G) and we found significant differences in BAF-deviation between the cell types tested at this age (G, ANOVA;  $p < 0.001$ , Tukey's test for multiple comparisons). Thus, the 4q CNN-LOH was readily detected in CD4<sup>+</sup> cells and granulocytes as well as in whole blood, whereas it was absent in CD19<sup>+</sup> cells. All estimates of percentages of cells with CNN-LOH presented in this figure were calculated using the MAD package. Analysis of samples taken at the age of 90 was performed in duplicate genotyping experiments on Illumina 1M-Duo and Omni-Express arrays with very similar results.

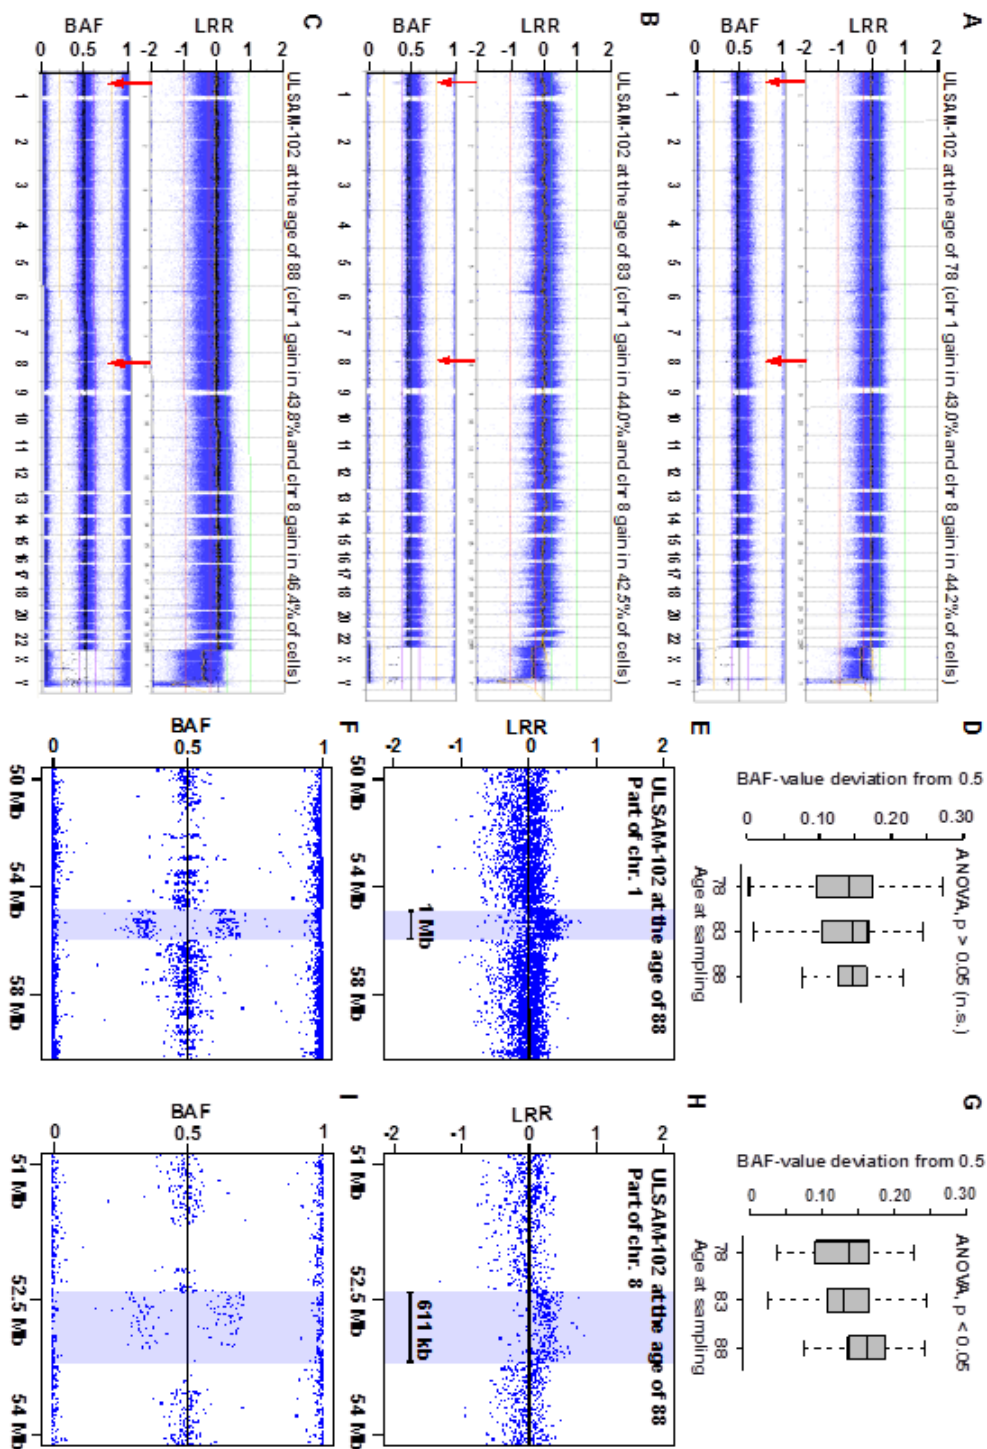

Figure S9. Slow Longitudinal Development of Two Cell Clones Showing Gains in the Single-Born ULSAM-102 Subject, as Detected by Log R Ratio (LRR) and B-Allele Frequency (BAF) using Illumina SNP Array



A 1.09 Mb gain on chromosome 1p shows a relatively stable frequency over a 10 year period of time (A–F, ANOVA,  $p>0.05$ ). Quantification using the MAD package shows that this cell clone contains an aberrant chromosome 1 in ~44 % of cells. The frequency of a cell clone with another aberration (611.3 kb gain on 8q) on the other hand, is slowly increasing over time (A–C, G–I, ANOVA,  $p<0.05$ ).

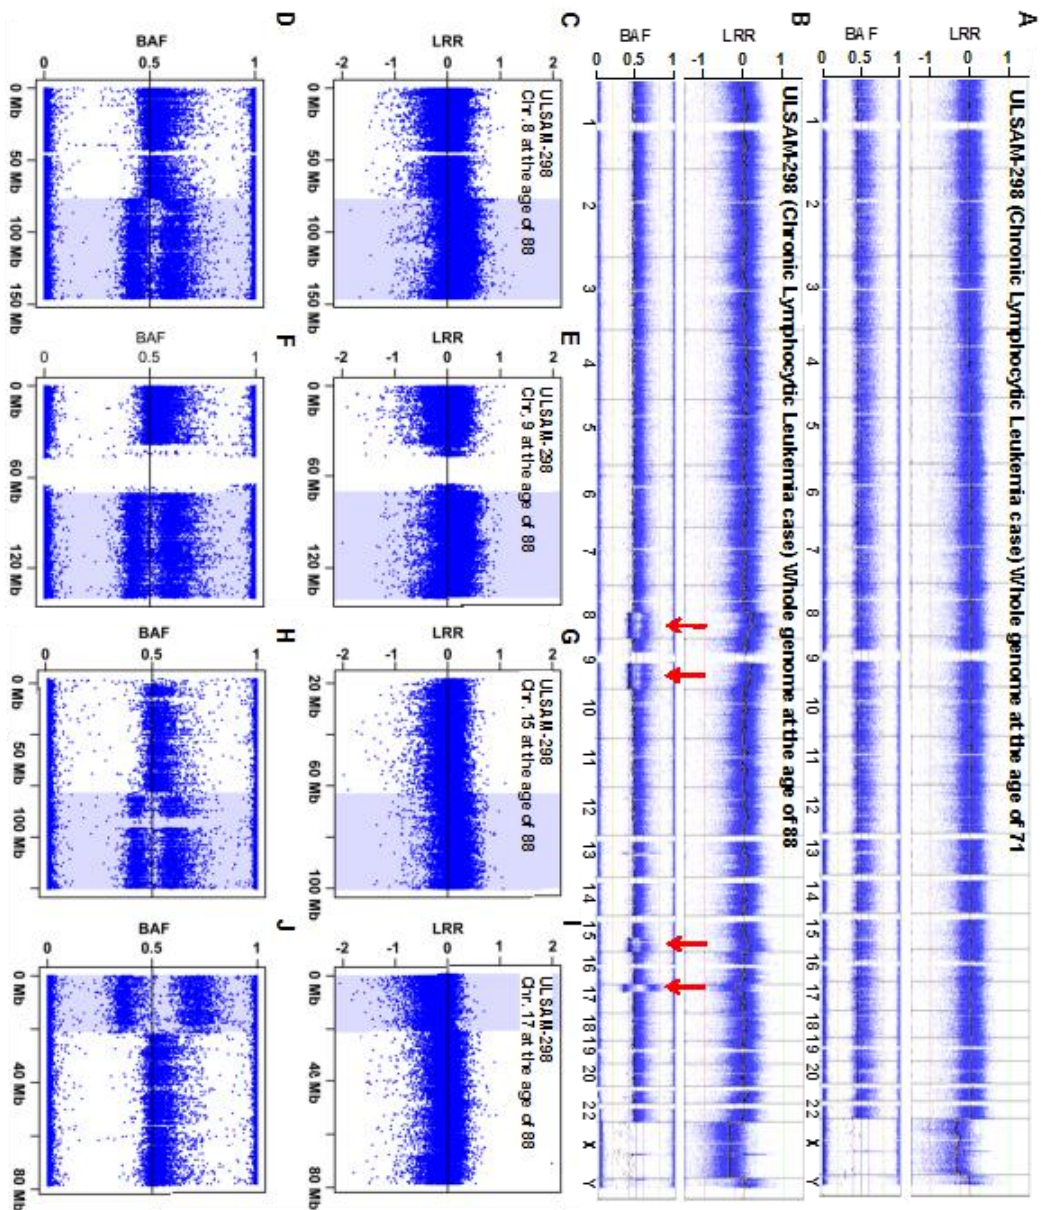

Figure S10. Large Copy Number Aberrations on Multiple Chromosomes Found in Blood from the 88-Year-Old Single-Born ULSAM-298 Subject (B) as Identified by Log R Ratio (LRR) and B-Allele Frequency (BAF) after Illumina SNP Array Analysis

The subject was diagnosed with chronic lymphocytic leukemia (CLL) with anemia and thrombocytopenia at the age of 87 and later prostate cancer with local spread to lymph nodes at the age of 90. No indications of genetic aberrations could be found in the blood drawn at the age of 71 (A).

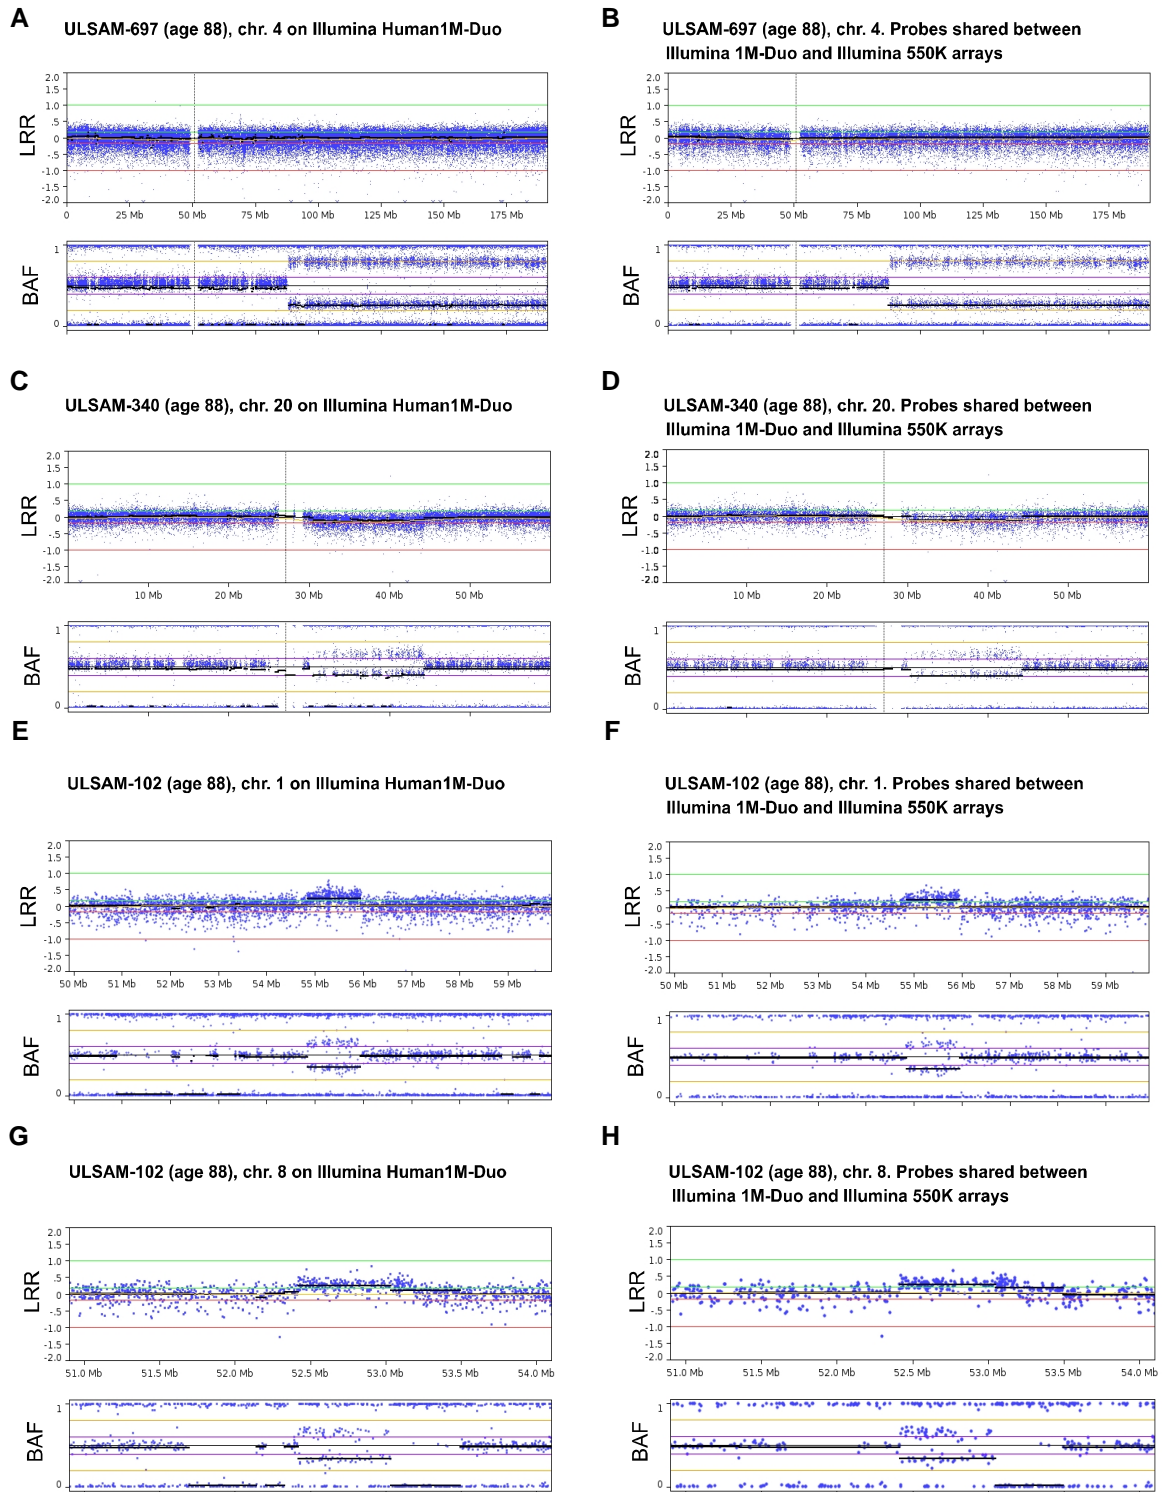

Figure S11. Comparison of Detection Sensitivity for Large-Scale Aberrations Between Illumina 550K Array and Illumina 1M-Duo Array, using Three Subjects From the ULSAM Cohort (ULSAM-697, -340, and -102)

Four structural aberrations uncovered in these three subjects ranged from 611 kb - 103 Mb and encompassed gains, deletion and CNN-LOH. The 550K platform contains 561495 probes of which 99% (557280) are also present on the 1M platform. On the left hand side (panels A, C, E, and G) we

plotted the relevant regions using all probes present in the 1M array. On the right hand side (panels B, D, F, and H) the same regions are plotted only using probes that are shared by both the 1M and the 550K platforms. Even the smallest of these aberrations (661 kb gain on 8q in ULSAM-102) is clearly detectable with probes derived exclusively from 550K array.

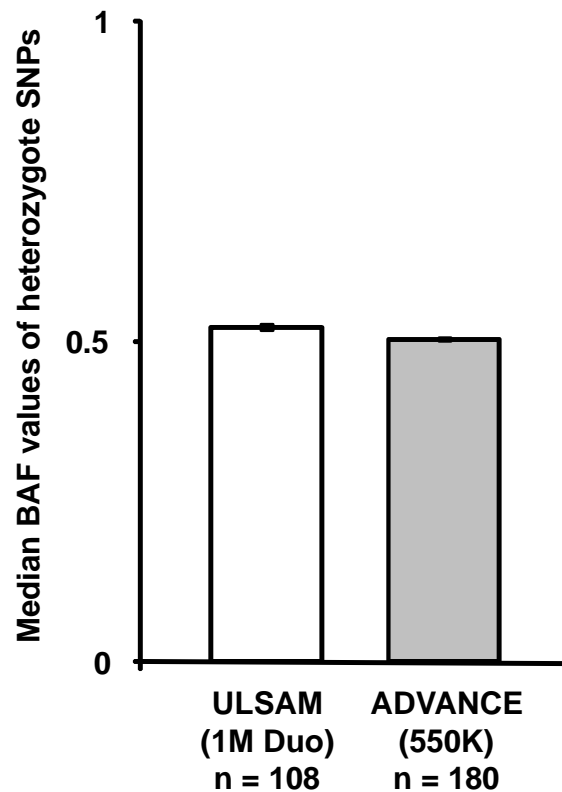

Figure S12. Evaluation of the Overall Genotyping Quality of Illumina 1M-Duo and Illumina 550K Experiments Used in the Analyses of the ULSAM and ADVANCE Cohorts

Plotting of the median BAF-values of heterozygous SNPs for each dataset reliably evaluates the variation in the BAF-values generated by the two platforms. In the ULSAM cohort genotyped on the 1M Duo platform, the median BAF-values of the heterozygote probes were 0.5248 (S.E.  $\pm$  0.0042) and the corresponding numbers for the ADVANCE cohort genotyped on the 550K platform were 0.5043 (S.E.  $\pm$  0.0023). This analysis shows that the BAF-variation of the 550K genotyping was more close to the theoretically expected 0.5 value, as compared to the 1M Duo results (t-test,  $p < 0.001$ ). Thus, the genotyping quality of ADVANCE cohort is at least as reliable as the results from ULSAM subjects. Error bars indicate standard errors. The raw data summarized in this figure are shown in Table S6.

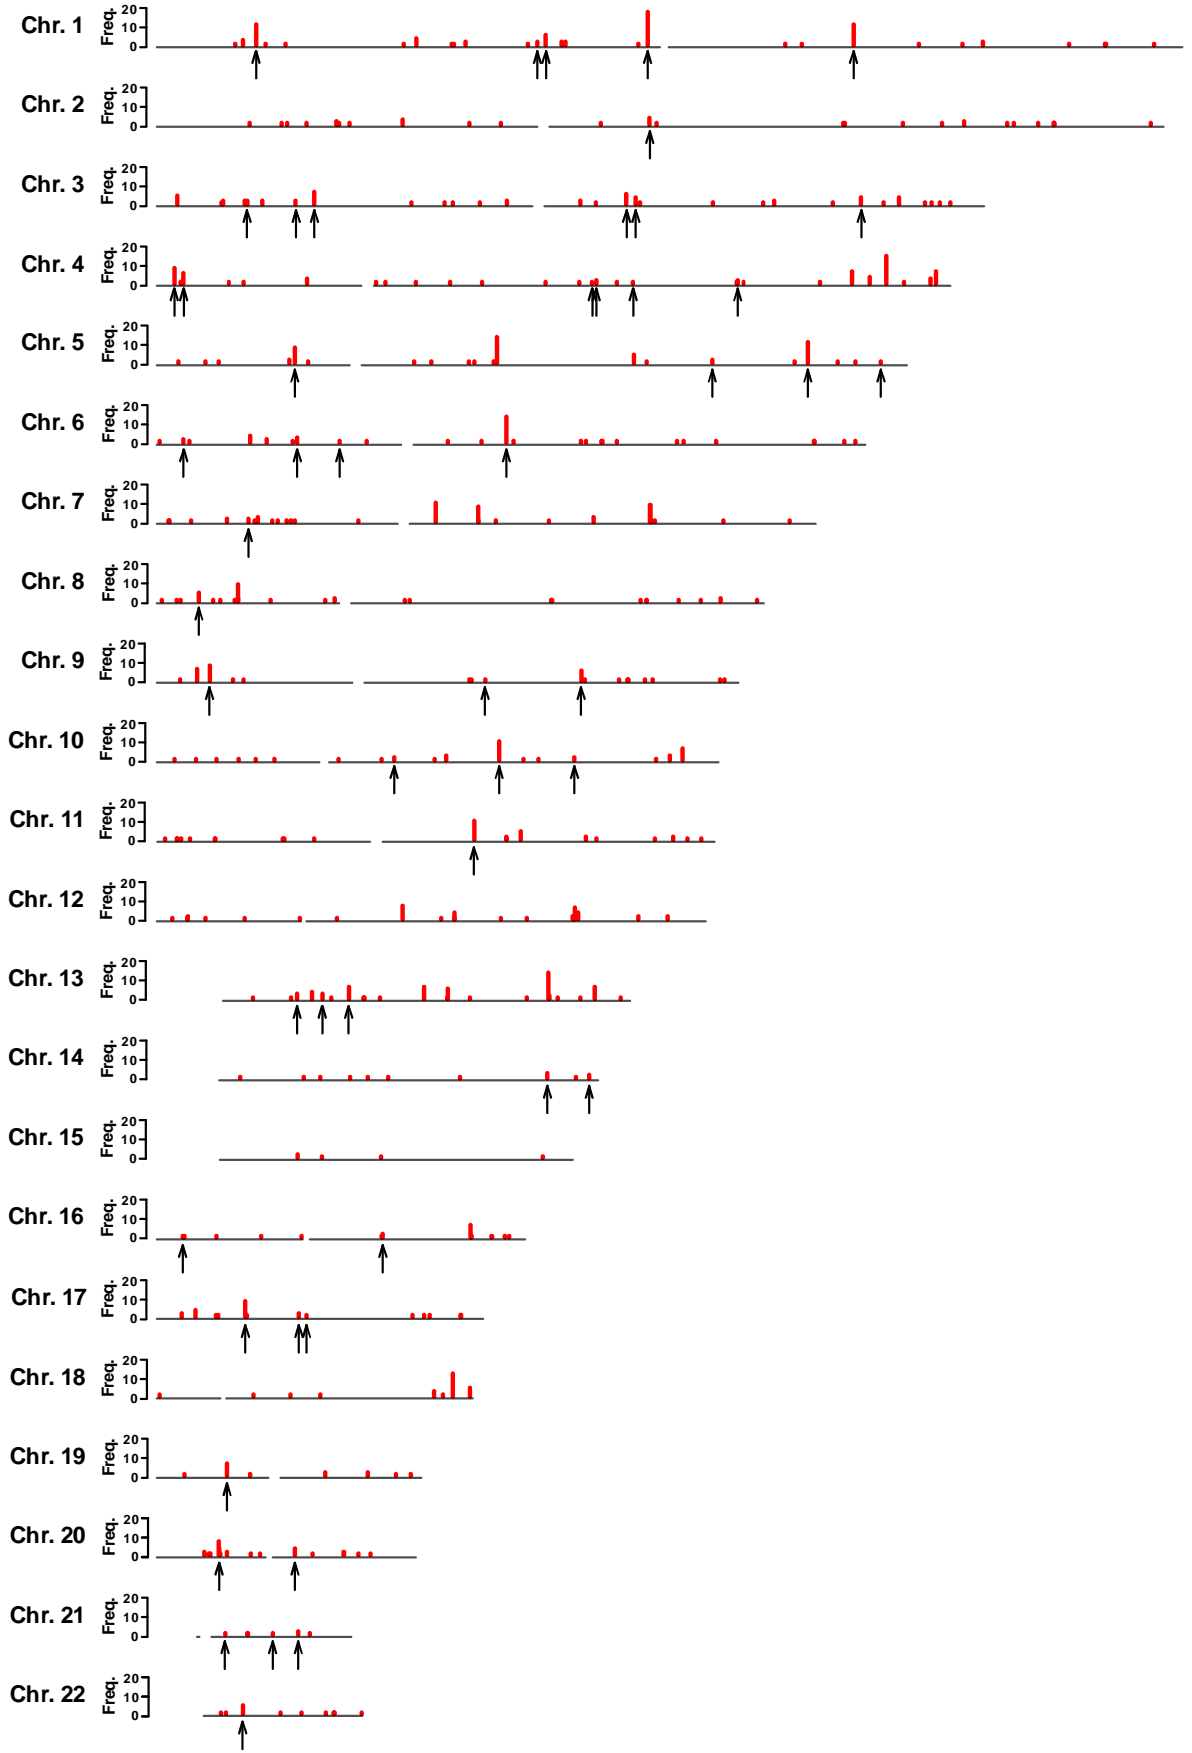

Figure S13. Nonrandom Genome-Wide Distribution of Calls from Small-Scale CNV Analysis using Delta-BAF Filter of 0.2 to 0.45 Combined with Delta-LRR>0.35 between 87 MZ Co-Twins (Figure S1).

Genomic positions (red bars) and frequencies (height of the red bar, maximum 20 occurrences) of 378 putative small-scale CNVs in 87 MZ twin pairs is shown. The data plotted here are derived from Figure 2B and Figure S4D. Black arrows indicate the positions of the 52 CNVs that were validated on the Nimblegen 135K array and which were varying within any of the 34 pairs tested (details shown in Table S4).

**Table S1. Summary of findings for monozygotic twins and single-born subjects from ULSAM cohort, which display mega-base range somatic structural genetic variants. The arbitrary limit of large-scale rearrangements has been set at 1 million basepairs (Mb).**

| Subject ID/<br>cohort <sup>a</sup> | Age at<br>sampling of<br>blood<br>(years) | Sex    | Type, size and position of large-scale<br>somatic genetic aberrations <sup>b</sup>                                                             | Platform of<br>primary analysis | Statistical support for Illumina data from<br>primary analysis platform that indicate<br>structural rearrangement <sup>c</sup>                        | Platforms used for<br>validation<br>experiments          | Selected clinical details (age of diagnosis)                                                                                                                 | Chemo-therapy<br>prior to<br>sampling of<br>blood for the<br>current study | Radio-therapy<br>prior to sampling<br>of blood for the<br>current study | Reference to<br>Figures and<br>Tables in this<br>paper |
|------------------------------------|-------------------------------------------|--------|------------------------------------------------------------------------------------------------------------------------------------------------|---------------------------------|-------------------------------------------------------------------------------------------------------------------------------------------------------|----------------------------------------------------------|--------------------------------------------------------------------------------------------------------------------------------------------------------------|----------------------------------------------------------------------------|-------------------------------------------------------------------------|--------------------------------------------------------|
| TP25-2/<br>MZ twin                 | 70 and 77                                 | female | deletion, 32.46 Mb on 5q, chr. 5: 82822000-115282500; size and position of the deletion is typical for patients with myelodysplastic syndrome  | Illumina 600K<br>beadchip       | p-value = 1.36 x 10e-214;<br>N-ROI = 5586 SNPs;<br>N-control = 30209 SNPs                                                                             | Illumina 1M Omni,<br>Nimblegen 720K,<br>qPCR             | dysthymic disorder (60), cholelithiasis (72), cerebral infarction due to thrombosis of cerebral arteries (80), deceased because of cerebral infarction (80). | no                                                                         | no                                                                      | Figs. 1 and 5                                          |
| TP30-1/<br>MZ twin                 | 69                                        | female | deletion, 12.91 Mb on 20q, chr. 20: 30333600-43245500; size and position of the deletion is typical for patients with myelodysplastic syndrome | Illumina 600K<br>beadchip       | p-value = 3.02 x 10e-76;<br>N-ROI = 2284 SNPs;<br>N-control = 12569 SNPs                                                                              | Illumina 1M Omni,<br>Nimblegen 720K,<br>qPCR             | melaena of unknown cause (79), fracture of the neck of femur (83)                                                                                            | no                                                                         | no                                                                      | Figs. 3 and 5                                          |
| TP12-2/<br>MZ twin                 | 77                                        | male   | terminal CNN-LOH, 76.47 Mb on 10q, chr. 10: 58880000-135347500; copy number imbalance of chromosome Y                                          | Illumina 600K<br>beadchip       | p-value = 1.48 x 10e-90;<br>N-ROI = 17169 SNPs;<br>N-control = 13630 SNPs <sup>d</sup>                                                                | Illumina 1M-Omni,<br>Illumina 1M-Duo ,<br>Nimblegen 720K | hyperplasia of prostate (66), gastro-esophageal laceration syndrome (Mallory–Weiss syndrome) (79)                                                            | no data                                                                    | no data                                                                 | Suppl. Fig. 5                                          |
| D8/<br>MZ twin <sup>e</sup>        | 60                                        | female | deletion, 1.62 Mb on 2p, chr. 2: 25312000-26937000                                                                                             | Illumina 600K<br>beadchip       | p-value = 2.87 x 10e-38;<br>N-ROI = 56 SNPs;<br>N-control = 15212 SNPs                                                                                |                                                          | no data                                                                                                                                                      | no data                                                                    | no data                                                                 |                                                        |
| 292/<br>MZ twin <sup>e</sup>       | 80                                        | male   | deletion, 22.65 Mb, chr.11, chr. 11: 102626700-125274000;<br>deletion, 86.93 Mb on chr. 4, chr. 4: 1-86929000;                                 | Illumina 600K<br>beadchip       | reported previously <sup>e</sup>                                                                                                                      |                                                          | Parkinson's disease (68), chronic lymphocytic leukemia (79), deceased (81)                                                                                   | no data                                                                    | no data                                                                 |                                                        |
| 298/<br>ULSAM                      | 71 and 88                                 | male   | gains and deletions on multiple chromosomes, see Supplementary Figure 7                                                                        | Illumina IM-Duo<br>beadchip     |                                                                                                                                                       | Illumina 1M-Duo                                          | chronic lymphocytic leukemia with anemia and thrombocytopenia (87), prostate cancer with local spread to lymph nodes (90)                                    | no                                                                         | no                                                                      | Suppl. Fig. 10                                         |
| 340/<br>ULSAM                      | 71, 75 and 88                             | male   | deletion, 13.83 Mb on 20q, chr. 20: 30506000-44334100; size and position of the deletion is typical for patients with myelodysplastic syndrome | Illumina IM-Duo<br>beadchip     | p-value < 2.23 x 10e-308;<br>N-ROI = 3449 SNPs;<br>N-control = 15093 SNPs                                                                             | Illumina 1M-Duo ,<br>Illumina Omni-<br>Express, qPCR     | malignant cancer of urinary bladder (67), idiopathic thrombocytopenic purpura (87)                                                                           | no                                                                         | no                                                                      | Figs. 4 and 5                                          |
| 697/<br>ULSAM                      | 71, 82, 88 and 90                         | male   | terminal CNN-LOH, 103.02 Mb on 4q, chr. 4: 88249500-191272500                                                                                  | Illumina IM-Duo<br>beadchip     | p-value = 1.614 x 10e-27;<br>N-ROI = 37007;<br>N-control = 31780                                                                                      | Illumina 1M-Duo ,<br>Illumina Omni-<br>Express           | Colon cancer in sigmoideum treated with surgery (76)                                                                                                         | no                                                                         | no                                                                      | Fig. 1 and Suppl. Fig. 8                               |
| 102/<br>ULSAM                      | 78, 83 and 88                             | male   | gain, 1.09 Mb on 1p, chr. 1: 54842600-55930500;<br>gain, 611.3 kb on 8q, chr. 8: 52422200-53033500;                                            | Illumina IM-Duo<br>beadchip     | p-value (1q gain) = 9.46 x 10e-99;<br>N-ROI=682 SNPs; N-control=905 SNPs<br>p-value (8q gain) < 2.23 x 10e-308;<br>N-ROI=208 SNPs; N-control=708 SNPs | Illumina 1M-Duo ,<br>Illumina Omni-<br>Express           | diffuse large-cell B-cell lymphoma in colon, stage IVA. Treated with partial resection of colon and chemotherapy (82)                                        | yes <sup>f</sup>                                                           | no                                                                      | Fig. 5 and Suppl. Fig. 9                               |

MZ - monozygotic; CNN-LOH - copy number neutral loss of heterozygosity, also called segmental uniparental disomy; Mb - million base pairs.

<sup>a</sup> - description of studied cohorts of monozygotic twins and single-born subjects is provided in Supplemental Table 2.

- b** - positions of aberrations are according to NCBI36/hg18 genome assembly.
- c** - Somatic genetic variation in the highlighted regions of interest (ROI) was determined by comparing B allele frequency (BAF) and/or Log R Ratio (LRR) measurements between MZ twin of the same pair for a set of SNP loci. For subjects from ULSAM cohort, the somatic *de novo* nature of the rearrangements was established by examination of samples taken at other time points and comparing BAF and/or LRR measurements between samples at different ages. Significance was calculated by comparing the BAF or LRR differences in twins and ULSAM single born subjects within the ROI and a control region using the Mann-Whitney U test. The control regions for twins TP12-2, TP25-2, TP30-1 and D8 as well as for ULSAM-340 and ULSAM-697 were the remainder of each corresponding chromosome outside the ROI. For smaller aberrations on 1q and 8q in ULSAM-102, 1 million base pairs on both sides of the ROI was selected as control regions.
- d** - indicate statistical analysis for CNN-LOH aberration on chromosome 10, encompassing approx. 75.5 MB.
- e** - reported previously in Bruder et al. (ref. <sup>20</sup>).
- f** - chemotherapy was received prior to sampling of blood at the age of 88.



**Table S2 I-X.** Summary of somatic mega-base range aberrations detected in the studied cohorts of monozygotic (MZ) twins and single-born subjects. The arbitrary limit of large-scale rearrangements has been set at 1 million basepairs (Mb).

**I**

| All subjects in the study                   |        |          |       |
|---------------------------------------------|--------|----------|-------|
|                                             | normal | Mb aber. | Total |
| Young/middle-aged subjects (age $\leq 55$ ) | 342    | 0        | 342   |
| Elderly/Old subjects (age $\geq 60$ )       | 255    | 9        | 264   |
| All ages                                    | 597    | 9        | 606   |

Fisher's Exact Test; p-value = 0.0005227

Elderly subjects with mega-base range aberrations (%) 3.4

**II**

| All Monozygotic twin pairs in the study |        |          |       |
|-----------------------------------------|--------|----------|-------|
|                                         | normal | Mb aber. | Total |
| Young/middle-aged pairs (age $< 60$ )   | 81     | 0        | 81    |
| Elderly/Old pairs (age $\geq 60$ )      | 73     | 5        | 78    |

Fisher's Exact Test; p-value = 0.02656

**VIII**

| All singleborns in the study |        |          |       |
|------------------------------|--------|----------|-------|
|                              | normal | Mb aber. | Total |
| Young/middle-aged subjects   | 180    | 0        | 180   |
| Elderly/Old subjects         | 104    | 4        | 108   |

Fisher's Exact Test; p-value = 0.01909

**III**

| MZ cohort 1: Karolinska Institutet - SATSA <sup>a</sup> |        |          |       |
|---------------------------------------------------------|--------|----------|-------|
|                                                         | normal | Mb aber. | Total |
| Young pairs                                             | 0      | 0        | 0     |
| Elderly/Old pairs (age $\geq 60$ )                      | 64     | 3        | 67    |

**IX**

| Singleborn cohort 1: Uppsala Univ. - ULSAM <sup>f</sup> |        |          |       |
|---------------------------------------------------------|--------|----------|-------|
|                                                         | normal | Mb aber. | Total |
| Young subjects                                          | 0      | 0        | 0     |
| Elderly/Old subjects (age 71-90)                        | 104    | 4        | 108   |

**IV**

| MZ cohort 2: NIH - Autoimmune <sup>b</sup> |        |          |       |
|--------------------------------------------|--------|----------|-------|
|                                            | normal | Mb aber. | Total |
| Young/middle-aged pairs (age 3-43)         | 22     | 0        | 22    |
| Elderly/Old pairs                          | 0      | 0        | 0     |

**X**

| Singleborn cohort 2: ADVANCE cohort <sup>g</sup> |        |          |       |
|--------------------------------------------------|--------|----------|-------|
|                                                  | normal | Mb aber. | Total |
| Young/middle-aged subjects (age 33-55)           | 180    | 0        | 180   |
| Elderly/Old subjects                             | 0      | 0        | 0     |

**V**

| MZ cohort 3: Univ. of Washington <sup>c</sup> |        |          |       |
|-----------------------------------------------|--------|----------|-------|
|                                               | normal | Mb aber. | Total |
| Young pairs (age 18-29)                       | 48     | 0        | 48    |
| Elderly/Old pairs                             | 0      | 0        | 0     |

**VI**

| MZ cohort 4: Published in AJHG <sup>d</sup> |        |          |       |
|---------------------------------------------|--------|----------|-------|
|                                             | normal | Mb aber. | Total |
| Young/middle-aged pairs (age $\leq 45$ )    | 8      | 0        | 8     |
| Elderly/Old subjects (age $\geq 60$ )       | 9      | 2        | 11    |

**VII**

| Other MZ twins analysed <sup>e</sup> |        |          |       |
|--------------------------------------|--------|----------|-------|
|                                      | normal | Mb aber. | Total |
| Young/middle-aged pairs (age 30-55)  | 3      | 0        | 3     |
| Elderly/Old pairs                    | 0      | 0        | 0     |

Mb aber. - number of subjects with mega-base range aberration  
normal - number of subjects with normal profiles

**Description of studied cohorts:**

<sup>a</sup> Karolinska Institutet - SATSA: The Swedish Adoption Twin Study of Aging (SATSA) is a longitudinal program of gerontological genetics based on all twins in the population based Swedish Twin Registry, who were separated before the age of 11 and reared apart and a matched sample of twins reared together. SATSA twins participated in up to 6 waves of questionnaires and 9 waves of in-person testing (IPT) during which a blood sample was collected. For the present investigation, 67 monozygotic pairs over the age of 60 years were selected. For 18 of these pairs, whole blood samples were available from 2 occasions at least 10 years apart and all samples at the second sampling were taken over the age of 60 years. For one additional monozygotic pair, samples available from two time points 7 years apart were also studied.

<sup>b</sup> NIH - Autoimmune: The MZ twin pairs from NIH are a subset of NIH-sponsored study on twins and close siblings discordant for a diagnosis of systemic autoimmune disease. For the present investigation, peripheral blood DNA from 22 young (age 3-43) MZ twin pairs discordant for autoimmune diseases was selected from among a group of 150 pairs who completed the study. Proband meets accepted criteria for adult or juvenile: 1) rheumatoid arthritis; or 2) systemic lupus erythematosus; or 3) myositis.

<sup>c</sup> University of Washington: The University of Washington Twin Registry (UWTR) is a community-based registry with a current enrollment of approximately 5 300 twin pairs in Washington State. For the present investigation, monozygotic (MZ) twin pairs were selected from among a group of 226 pairs who completed a study on the genetics of human innate immunity. Participants in that study were generally healthy, had no immune or inflammatory diseases, and were otherwise phenotypically unselected. The 48 pairs randomly selected for this study met the criterion of young age (18-29 years) and uniform European descent ethnicity. Peripheral blood-derived DNA was used for genotyping.

<sup>d</sup> published previously (Bruder et al., ref. <sup>20</sup>).

<sup>e</sup> other MZ twins: two pairs of the MZ twins in this subset are derived from the Norwegian Institute of Public Health/Norwegian Twin Registry. These are normal 37 and 39 year old MZ pairs of healthy controls used in the ongoing project related to genetics of asthma (unpublished). The third pair of MZ twins is derived from Mount Sinai Hospital Medical Center, Chicago, Illinois, USA. This 55 year old MZ twin pair is discordant for the severity of sickle cell disease phenotype. Both MZ twins carry homozygous mutations in the beta-globin gene causing the sickle cell disease (unpublished).

<sup>f</sup> Uppsala University - ULSAM: Uppsala Longitudinal Study of Adult Men (ULSAM) (<http://www2.pubcare.uu.se/ULSAM/index.htm>) was started in 1970-1974, when all fifty-year-old men living in Uppsala County, Sweden, were invited to a health survey, initially focusing at identifying risk factors for cardiovascular disease. Out of a total of 2841 men born in 1920-1924, 2322 (82%) agreed to participate in the study. Since then, the cohort has been re-investigated several times. For the present analysis peripheral blood DNA from 108 men were randomly selected from 296 participants of health investigation at 88 years of age. For a few selected cases displaying large-scale genetic changes, DNA obtained at 70, 77, and 82 years investigations was also used. Informed consent from all participating subjects was obtained.

<sup>g</sup> ADVANCE: The dataset is derived from Atherosclerotic Disease, Vascular Function, and Genetic Epidemiology (ADVANCE) study; a genome-wide association analysis of coronary artery disease (refs. <sup>30;31</sup>). The peripheral blood DNA from healthy controls and diseased individuals was collected in Kaiser Permanente clinics in Northern California and at Stanford University, and genotyped on Illumina 550K arrays. We analyzed the LRR and BAF data from 180 control individuals of European descent who had no evidence of cardiovascular disease. The age range for these controls was 33-55 years.

Table S3. Age and Genotyping Quality of 87 MZ Twin Pairs Included in the Aging Analysis Plotted in Figures 2A–2F

| Cohort           | Twin pair ID      | Age at sampling | Genotyping quality twin 1 | Genotyping quality twin 2 | Difference in genotyping quality between twin 1 and twin 2 |
|------------------|-------------------|-----------------|---------------------------|---------------------------|------------------------------------------------------------|
| NIH - Autoimmune | 004-01 / 004-02   | 43.0            | 0.02                      | 0.02                      | 0.00                                                       |
| NIH - Autoimmune | 010-01 / 010-02   | 13.0            | 0.04                      | 0.03                      | 0.01                                                       |
| NIH - Autoimmune | 012-01 / 012-02   | 9.0             | 0.02                      | 0.03                      | 0.01                                                       |
| NIH - Autoimmune | 016-01 / 016-02   | 34.0            | 0.02                      | 0.03                      | 0.01                                                       |
| NIH - Autoimmune | 030-01 / 030-02   | 35.0            | 0.02                      | 0.03                      | 0.01                                                       |
| NIH - Autoimmune | 033-01 / 033-02   | 13.0            | 0.02                      | 0.02                      | 0.00                                                       |
| NIH - Autoimmune | 049-01 / 049-02   | 20.0            | 0.02                      | 0.03                      | 0.01                                                       |
| NIH - Autoimmune | 061-01 / 061-02   | 12.0            | 0.02                      | 0.02                      | 0.00                                                       |
| NIH - Autoimmune | 065-01 / 065-02   | 15.0            | 0.02                      | 0.04                      | 0.02                                                       |
| NIH - Autoimmune | 078-01 / 078-02   | 8.0             | 0.03                      | 0.02                      | 0.01                                                       |
| NIH - Autoimmune | 079-01 / 079-02   | 29.0            | 0.02                      | 0.03                      | 0.00                                                       |
| NIH - Autoimmune | 080-01 / 080-02   | 12.0            | 0.02                      | 0.02                      | 0.01                                                       |
| NIH - Autoimmune | 082-01 / 082-02   | 19.0            | 0.02                      | 0.02                      | 0.00                                                       |
| NIH - Autoimmune | 085-01 / 085-02   | 18.0            | 0.02                      | 0.02                      | 0.00                                                       |
| NIH - Autoimmune | 086-01 / 086-02   | 6.0             | 0.02                      | 0.03                      | 0.01                                                       |
| NIH - Autoimmune | 103-01 / 103-02   | 3.0             | 0.03                      | 0.02                      | 0.01                                                       |
| NIH - Autoimmune | 112-01 / 112-02   | 8.0             | 0.03                      | 0.03                      | 0.00                                                       |
| NIH - Autoimmune | 127-01 / 127-02   | 11.0            | 0.03                      | 0.02                      | 0.00                                                       |
| NIH - Autoimmune | 129-01 / 129-02   | 5.0             | 0.02                      | 0.03                      | 0.01                                                       |
| NIH - Autoimmune | 132-01 / 132-02   | 20.0            | 0.02                      | 0.02                      | 0.00                                                       |
| NIH - Autoimmune | 148-01 / 148-02   | 22.0            | 0.02                      | 0.02                      | 0.00                                                       |
| NIH - Autoimmune | 151-01 / 151-02   | 6.0             | 0.02                      | 0.02                      | 0.00                                                       |
| KI - SATSA       | TP49A-1 / TP49A-2 | 69.0            | 0.07                      | 0.06                      | 0.00                                                       |
| KI - SATSA       | TP51A-1 / TP51A-2 | 68.0            | 0.05                      | 0.05                      | 0.00                                                       |
| KI - SATSA       | TP43B-1 / TP43B-2 | 82.4            | 0.05                      | 0.05                      | 0.00                                                       |
| KI - SATSA       | TP44B-1 / TP44B-2 | 82.7            | 0.05                      | 0.05                      | 0.00                                                       |
| KI - SATSA       | TP45B-1 / TP45B-2 | 82.4            | 0.07                      | 0.07                      | 0.00                                                       |
| KI - SATSA       | TP46B-1 / TP46B-2 | 80.5            | 0.05                      | 0.05                      | 0.01                                                       |
| KI - SATSA       | TP47B-1 / TP47B-2 | 80.8            | 0.07                      | 0.06                      | 0.01                                                       |
| KI - SATSA       | TP48B-1 / TP48B-2 | 79.8            | 0.05                      | 0.05                      | 0.00                                                       |
| KI - SATSA       | TP50B-1 / TP50B-2 | 78.6            | 0.05                      | 0.05                      | 0.01                                                       |
| KI - SATSA       | TP52B-1 / TP52B-2 | 78.0            | 0.06                      | 0.06                      | 0.00                                                       |
| KI - SATSA       | TP53B-1 / TP53B-2 | 76.2            | 0.06                      | 0.06                      | 0.01                                                       |
| KI - SATSA       | TP54B-1 / TP54B-2 | 68.4            | 0.08                      | 0.07                      | 0.01                                                       |
| KI - SATSA       | TP55B-1 / TP55B-2 | 65.3            | 0.06                      | 0.05                      | 0.00                                                       |
| KI - SATSA       | TP56B-1 / TP56B-2 | 66.2            | 0.05                      | 0.05                      | 0.01                                                       |
| KI - SATSA       | TP57B-1 / TP57B-2 | 65.2            | 0.05                      | 0.04                      | 0.01                                                       |
| KI - SATSA       | TP58B-1 / TP58B-2 | 64.4            | 0.04                      | 0.03                      | 0.00                                                       |
| KI - SATSA       | TP59B-1 / TP59B-2 | 63.3            | 0.04                      | 0.04                      | 0.01                                                       |
| KI - SATSA       | TP60B-1 / TP60B-2 | 62.6            | 0.03                      | 0.03                      | 0.00                                                       |

|                  |                   |      |      |      |      |
|------------------|-------------------|------|------|------|------|
| KI - SATSA       | TP61B-1 / TP61B-2 | 60.7 | 0.06 | 0.05 | 0.01 |
| KI - SATSA       | TP62B-1 / TP62B-2 | 75.7 | 0.05 | 0.05 | 0.00 |
| KI - SATSA       | TP63B-1 / TP63B-2 | 76.1 | 0.06 | 0.05 | 0.01 |
| KI - SATSA       | TP64B-1 / TP64B-2 | 75.9 | 0.07 | 0.06 | 0.01 |
| KI - SATSA       | TP66B-1 / TP66B-2 | 75.1 | 0.05 | 0.07 | 0.02 |
| KI - SATSA       | TP67B-1 / TP67B-2 | 75.8 | 0.04 | 0.04 | 0.00 |
| KI - SATSA       | TP3-1 / TP3-2     | 85.9 | 0.07 | 0.07 | 0.00 |
| KI - SATSA       | TP5-1 / TP5-2     | 81.0 | 0.08 | 0.08 | 0.01 |
| KI - SATSA       | TP6-1 / TP6-2     | 81.0 | 0.06 | 0.08 | 0.01 |
| KI - SATSA       | TP7-1 / TP7-2     | 81.0 | 0.06 | 0.06 | 0.00 |
| KI - SATSA       | TP8-1 / TP8-2     | 77.8 | 0.06 | 0.06 | 0.00 |
| KI - SATSA       | TP9-1 / TP9-2     | 78.1 | 0.05 | 0.05 | 0.00 |
| KI - SATSA       | TP10-1 / TP10-2   | 76.5 | 0.07 | 0.08 | 0.01 |
| KI - SATSA       | TP11-1 / TP11-2   | 78.2 | 0.07 | 0.07 | 0.00 |
| KI - SATSA       | TP12-1 / TP12-2   | 77.3 | 0.07 | 0.09 | 0.02 |
| KI - SATSA       | TP13-1 / TP13-2   | 77.0 | 0.06 | 0.07 | 0.01 |
| KI - SATSA       | TP14-1 / TP14-2   | 75.5 | 0.07 | 0.07 | 0.00 |
| KI - SATSA       | TP15-1 / TP15-2   | 75.8 | 0.07 | 0.06 | 0.01 |
| KI - SATSA       | TP16-1 / TP16-2   | 77.3 | 0.06 | 0.07 | 0.00 |
| KI - SATSA       | TP18-1 / TP18-2   | 75.0 | 0.07 | 0.07 | 0.00 |
| KI - SATSA       | TP19-1 / TP19-2   | 74.6 | 0.09 | 0.08 | 0.00 |
| KI - SATSA       | TP20-1 / TP20-2   | 73.0 | 0.06 | 0.06 | 0.01 |
| KI - SATSA       | TP21-1 / TP21-2   | 71.4 | 0.05 | 0.04 | 0.00 |
| KI - SATSA       | TP24-1 / TP24-2   | 71.0 | 0.05 | 0.06 | 0.01 |
| KI - SATSA       | TP25-1 / TP25-2   | 76.7 | 0.06 | 0.04 | 0.02 |
| KI - SATSA       | TP26-1 / TP26-2   | 72.0 | 0.06 | 0.06 | 0.00 |
| KI - SATSA       | TP27-1 / TP27-2   | 69.7 | 0.07 | 0.05 | 0.01 |
| KI - SATSA       | TP28-1 / TP28-2   | 74.4 | 0.05 | 0.05 | 0.00 |
| KI - SATSA       | TP29-1 / TP29-2   | 68.9 | 0.08 | 0.07 | 0.01 |
| KI - SATSA       | TP30-1 / TP30-2   | 68.9 | 0.08 | 0.06 | 0.02 |
| KI - SATSA       | TP31-1 / TP31-2   | 69.0 | 0.06 | 0.06 | 0.00 |
| KI - SATSA       | TP33-1 / TP33-2   | 66.8 | 0.03 | 0.04 | 0.01 |
| KI - SATSA       | TP39-1 / TP39-2   | 66.6 | 0.03 | 0.04 | 0.01 |
| KI - SATSA       | TP40-1 / TP40-2   | 66.4 | 0.07 | 0.06 | 0.01 |
| KI - SATSA       | TP41-1 / TP41-2   | 65.5 | 0.08 | 0.09 | 0.01 |
| KI - SATSA       | TP42-1 / TP42-2   | 68.3 | 0.09 | 0.07 | 0.02 |
| KI - SATSA       | TP1-1 / TP1-2     | 68.0 | 0.08 | 0.07 | 0.00 |
| KI - SATSA       | TP34-1 / TP34-2   | 65.4 | 0.09 | 0.09 | 0.01 |
| KI - SATSA       | TP37-1 / TP37-2   | 64.2 | 0.07 | 0.08 | 0.01 |
| KI - SATSA       | TP38-1 / TP38-2   | 68.7 | 0.07 | 0.06 | 0.01 |
| Univ. Washington | DDS101A / DDS101B | 29.0 | 0.04 | 0.04 | 0.00 |
| Univ. Washington | DDS126A / DDS126B | 19.0 | 0.04 | 0.04 | 0.00 |
| Univ. Washington | DDS127A / DDS127B | 19.0 | 0.04 | 0.04 | 0.00 |
| Univ. Washington | DDS130A / DDS130B | 26.0 | 0.04 | 0.04 | 0.00 |
| Univ. Washington | DDS136A / DDS136B | 22.0 | 0.05 | 0.05 | 0.00 |
| Univ. Washington | DDS140A / DDS140B | 20.0 | 0.04 | 0.04 | 0.00 |
| Univ. Washington | DDS141A / DDS141B | 22.0 | 0.04 | 0.04 | 0.00 |

---

Genotyping quality was calculated by the Nexus 5 software (Biodiscovery, Inc. CA, USA). Quality criteria for inclusion of pairs in the analysis; NQ < 0.1 for all individuals and maximum NQ difference within pairs of 0.02.

**Table S4.** Small-scale CNVs validated with the Nimblegen 135K array. The details of 52 loci called by deltaBAF script comparing 87 twin pairs (using parameters:  $0.2 < \Delta \text{BAF} < 0.45$  and  $\Delta \text{LRR} > 0.35$ ), which were validated using array-CGH hybridization on Nimblegen tiling-path 135K oligonucleotide array, in 34 MZ twin pairs.

| SNP name  | Chr | Position (NCBI36 / hg18) | Type of aberration as indicated by Illumina genotyping / twin ID | Design window for Nimblegen 135K custom array (NCBI36/hg18) <sup>a</sup> | Number of times loci were validated in any MZ pairs tested (n=34) <sup>b</sup> | Size of a region showing CNV acc. to Nimblegen array (bp) <sup>c</sup> | Genomic position relative to neighboring gene | Official gene symbol | Gene name                                        | Gene Ontology (GO) / Biological process (geneontology.org)                                                                                                                                                                                                                                                                                                               | Representative annotations in Genetic Association Database (geneticassociationdb.nih.gov) | Reference to Figures in the current paper |
|-----------|-----|--------------------------|------------------------------------------------------------------|--------------------------------------------------------------------------|--------------------------------------------------------------------------------|------------------------------------------------------------------------|-----------------------------------------------|----------------------|--------------------------------------------------|--------------------------------------------------------------------------------------------------------------------------------------------------------------------------------------------------------------------------------------------------------------------------------------------------------------------------------------------------------------------------|-------------------------------------------------------------------------------------------|-------------------------------------------|
| rs2298679 | 21  | 34169330                 | deletion/ TP26-2                                                 | Chr21:34160757-34176363                                                  | 16                                                                             | 200-2500                                                               | intronic                                      | <i>ITSN1</i>         | Intersectin 1 (SH3 domain protein)               | GO:0006897 endocytosis<br>GO:0006915 apoptosis<br>GO:0007242 intracellular signaling cascade<br>GO:0010627 regulation of protein kinase cascade<br>GO:0010647 positive regulation of cell communication<br>GO:0035023 regulation of Rho protein signal transduction<br>GO:0046578 regulation of Ras protein signal transduction<br>GO:0048489 synaptic vesicle transport |                                                                                           | Suppl. Fig. 6K                            |
| rs329312  | 5   | 133928397                | deletion/ TP45B-1                                                | Chr5:133922480-133931913                                                 | 14                                                                             | 120-6700                                                               | intronic                                      | <i>PHF15</i>         | Protein Jade-2 (PHD finger protein 15).          | GO:0006325 chromatin organization<br>GO:0016573 histone acetylation                                                                                                                                                                                                                                                                                                      |                                                                                           | Fig. 5 and Suppl. Fig 6G                  |
| rs2295330 | 1   | 93809917                 | deletion/ TP61B-1                                                | Chr1:93792635-93822025                                                   | 14                                                                             | 100-7000                                                               | exonic/prot. coding                           | <i>BCAR3</i>         | Breast cancer anti-estrogen resistance protein 3 | GO:0007242 intracellular signaling cascade<br>GO:0042493 response to drug                                                                                                                                                                                                                                                                                                |                                                                                           | Suppl. Fig. 6H                            |
| rs7943716 | 11  | 76515147                 | deletion/ TP61B-2                                                | Chr11:76509459-76518557                                                  | 13                                                                             | 450-5600                                                               | 5 prime near gene                             | <i>MYO7A</i>         | Myosin VIIA                                      | GO:0006897 endocytosis<br>GO:0009791 post-embryonic development<br>GO:0016192 vesicle-mediated transport<br>GO:0030029 actin filament-based process<br>GO:0033059 cellular pigmentation<br>GO:0042462 eye photoreceptor cell development<br>GO:0042472 inner ear morphogenesis<br>GO:0048598 embryonic morphogenesis<br>GO:0048666 neuron development                    | 131268: Usher syndrome.<br>131267: hearing loss, sensorineural nonsyndromic.              |                                           |
| rs7140154 | 14  | 104234577                | deletion/ TP9-2                                                  | Chr14:104219500-104239659                                                | 12                                                                             | 170-520                                                                | intronic                                      | <i>INF2</i>          | Inverted formin, FH2 and WH2 domain containing   | GO:0030036 actin cytoskeleton organization                                                                                                                                                                                                                                                                                                                               |                                                                                           | Suppl. Fig. 6M                            |
| rs4841318 | 8   | 10224610                 | deletion/ TP20-2                                                 | Chr8:10223763-10226754                                                   | 10                                                                             | 270-1600                                                               | intronic                                      | <i>MSRA</i>          | Methionine sulfoxide reductase A                 | GO:0000096 sulfur amino acid metabolic process<br>GO:0006979 response to oxidative stress<br>GO:0009066 aspartate family amino acid metabolic process<br>GO:0055114 oxidation reduction                                                                                                                                                                                  | 598839: obesity.<br>598840: hypertension.<br>591255: aging/ Telomere Length.              | Fig. 5 and Suppl. Fig. 6J                 |
| rs762470  | 22  | 20745546                 | gain/ 126-01                                                     | Chr22:20742965-20746773                                                  | 10                                                                             | 100-1850                                                               | intergenic                                    |                      |                                                  |                                                                                                                                                                                                                                                                                                                                                                          |                                                                                           | Suppl. Fig. 6P                            |
| rs1122554 | 6   | 33906568                 | gain/ TP62B-1                                                    | Chr6:33901993-33912725                                                   | 9                                                                              | 800-5870                                                               | intergenic                                    |                      |                                                  |                                                                                                                                                                                                                                                                                                                                                                          |                                                                                           |                                           |
| rs7725069 | 5   | 156922335                | deletion/ TP10-1                                                 | Chr5:156898973-156930192                                                 | 9                                                                              | 500-13000                                                              | intronic                                      | <i>ADAM19</i>        | ADAM metalloproteinase domain 19 (meltrin beta)  | GO:0006508 proteolysis<br>GO:0007507 heart development<br>GO:0030163 protein catabolic process                                                                                                                                                                                                                                                                           | 596733: lung diseases.                                                                    | Suppl. Fig. 6A                            |

|            |    |           |                   |                           |   |           |            |                  |                                                                                   |                                                                                                                                                                                                                                                                                                                                                                                                                                                        |                                           |                    |
|------------|----|-----------|-------------------|---------------------------|---|-----------|------------|------------------|-----------------------------------------------------------------------------------|--------------------------------------------------------------------------------------------------------------------------------------------------------------------------------------------------------------------------------------------------------------------------------------------------------------------------------------------------------------------------------------------------------------------------------------------------------|-------------------------------------------|--------------------|
| rs4635020  | 10 | 100703080 | gain/ 086-02      | Chr10:100694478-100708297 | 9 | 550-750   | intronic   | <i>HPSE2</i>     | Heparanase 2                                                                      | GO:0005975 carbohydrate metabolic process                                                                                                                                                                                                                                                                                                                                                                                                              |                                           | Fig. 2G and Fig. 5 |
| rs2725759  | 4  | 105925776 | deletion/ TP9-1   | Chr4:105919791-105935580  | 8 | 760-2420  | intergenic |                  |                                                                                   |                                                                                                                                                                                                                                                                                                                                                                                                                                                        |                                           |                    |
| rs17590228 | 17 | 34290556  | deletion/ TP38-1  | Chr17:34289814-34301384   | 8 | 150-3320  | intronic   | <i>LASP1</i>     | LIM and SH3 domain protein 1                                                      | GO:0006811 ion transport<br>GO:0007010 cytoskeleton organization                                                                                                                                                                                                                                                                                                                                                                                       |                                           |                    |
| rs4546191  | 4  | 140066658 | deletion/ TP11-2  | Chr4:140058604-140067694  | 7 | 330-680   | intergenic |                  |                                                                                   |                                                                                                                                                                                                                                                                                                                                                                                                                                                        |                                           | Suppl. Fig. 6S     |
| rs1363688  | 5  | 174542337 | deletion/ TP61B-2 | Chr5:174537430-174544755  | 7 | 270-3900  | intergenic |                  |                                                                                   |                                                                                                                                                                                                                                                                                                                                                                                                                                                        |                                           | Suppl. Fig. 6Q     |
| rs7770346  | 6  | 44053666  | deletion/ TP52B-2 | Chr6:44049423-44058119    | 6 | 220-3720  | intergenic |                  |                                                                                   |                                                                                                                                                                                                                                                                                                                                                                                                                                                        |                                           |                    |
| rs1014028  | 4  | 114807814 | deletion/ TP19-2  | Chr4:114805049-114813115  | 6 | 430-1450  | intronic   | <i>CAMK2D</i>    | Calcium/calmodulin-dependent protein kinase type II delta chain                   | GO:0001666 response to hypoxia<br>GO:0003013 circulatory system process<br>GO:0006468 protein amino acid phosphorylation<br>GO:0006796 phosphate metabolic process<br>GO:0006816 calcium ion transport<br>GO:0006936 muscle contraction<br>GO:0007346 regulation of mitotic cell cycle<br>GO:0008015 blood circulation<br>GO:0008284 positive regulation of cell proliferation<br>GO:0055075 potassium ion homeostasis<br>GO:0060047 heart contraction |                                           | Suppl. Fig. 6N     |
| rs9837352  | 3  | 37957465  | gain/ TP28-1      | Chr3:37951504-37961453    | 6 | 750-2760  | intronic   | <i>CTDSPL</i>    | CTD small phosphatase-like protein                                                |                                                                                                                                                                                                                                                                                                                                                                                                                                                        | 597391: breast and prostate cancers.      | Suppl. Fig. 6D     |
| rs7434469  | 4  | 6461647   | deletion/ 004-01  | Chr4:6460249-6467129      | 5 | 360-600   | intronic   | <i>PPP2R2C</i>   | Serine/threonine-protein phosphatase 2A 55 kDa regulatory subunit B gamma isoform | GO:0007165 signal trasduction                                                                                                                                                                                                                                                                                                                                                                                                                          | 599364: type 2 diabetes and other traits. | Suppl. Fig. 6I     |
| rs2755223  | 13 | 39942303  | deletion/ TP54B-2 | Chr13:39941238-39945268   | 5 | 1270-3300 | intergenic | <i>LOC646982</i> | TTL/TEL fusion protein TTL-B1.                                                    |                                                                                                                                                                                                                                                                                                                                                                                                                                                        |                                           |                    |
| rs774759   | 3  | 113204782 | deletion/ TP26-2  | Chr3:113202955-113206660  | 5 | 340-800   | intronic   | <i>TAGLN3</i>    | Transgelin-3                                                                      | GO:0007517 muscle organ development                                                                                                                                                                                                                                                                                                                                                                                                                    |                                           |                    |
| rs10465148 | 9  | 102342854 | gain/ TP31-2      | Chr9:102301849-102367454  | 5 | 300-3820  | intronic   | <i>TMEFF1</i>    | Transmembrane protein with EGF-like and two follistatin-like domains 1            |                                                                                                                                                                                                                                                                                                                                                                                                                                                        |                                           |                    |
| rs2462957  | 17 | 36095487  | deletion/ 086-02  | Chr17:36061575-36122206   | 5 | 370-670   | intergenic |                  |                                                                                   |                                                                                                                                                                                                                                                                                                                                                                                                                                                        |                                           | Suppl. Fig. 6E     |
| rs4679072  | 3  | 33549244  | gain/ TP12-1      | Chr3:33530028-33578111    | 5 | 480-2000  | intronic   | <i>CLASP2</i>    | CLIP-associating protein 2                                                        | GO:0007067 mitosis<br>GO:0016477 cell migration<br>GO:0033043 regulation of organelle organization<br>GO:0070507 regulation of microtubule cytoskeleton organization                                                                                                                                                                                                                                                                                   |                                           |                    |
| rs1606852  | 3  | 21812680  | deletion/ TP20-1  | Chr3:21810800-21817108    | 5 | 300-1790  | intergenic |                  |                                                                                   |                                                                                                                                                                                                                                                                                                                                                                                                                                                        |                                           |                    |
| rs2189167  | 4  | 104953292 | gain/ TP11-1      | Chr4:104941311-104955235  | 4 | 610-820   | intergenic |                  |                                                                                   |                                                                                                                                                                                                                                                                                                                                                                                                                                                        |                                           | Suppl. Fig. 6T     |
| rs2076346  | 1  | 23956236  | gain/ TP1-1       | Chr1:23923511-23974867    | 4 | 1050-1080 | intronic   | <i>TCEB3</i>     | Transcription elongation factor B polypeptide 3                                   | GO:0006351 transcription, DNA-dependent                                                                                                                                                                                                                                                                                                                                                                                                                |                                           |                    |

|            |    |           |                      |                          |   |            |            |                 |                                                                   |                                                                                                                                                                                                                                                                                                                                                                                                                                                                                                                                                                                                                                                                                                                                                                         |                                                                                                                                                                                                                                                                                       |                              |
|------------|----|-----------|----------------------|--------------------------|---|------------|------------|-----------------|-------------------------------------------------------------------|-------------------------------------------------------------------------------------------------------------------------------------------------------------------------------------------------------------------------------------------------------------------------------------------------------------------------------------------------------------------------------------------------------------------------------------------------------------------------------------------------------------------------------------------------------------------------------------------------------------------------------------------------------------------------------------------------------------------------------------------------------------------------|---------------------------------------------------------------------------------------------------------------------------------------------------------------------------------------------------------------------------------------------------------------------------------------|------------------------------|
| rs2916182  | 5  | 33293060  | gain/ TP28-2         | Chr5:33287049-33297208   | 4 | 500-620    | intergenic |                 |                                                                   |                                                                                                                                                                                                                                                                                                                                                                                                                                                                                                                                                                                                                                                                                                                                                                         |                                                                                                                                                                                                                                                                                       | Suppl. Fig. 6B               |
| rs4935610  | 10 | 57248430  | gain/ TP63B-2        | Chr10:57241675-57260771  | 4 | 450-1300   | intergenic |                 |                                                                   |                                                                                                                                                                                                                                                                                                                                                                                                                                                                                                                                                                                                                                                                                                                                                                         |                                                                                                                                                                                                                                                                                       | Suppl. Fig. 6R               |
| rs708039   | 6  | 6432930   | deletion/<br>TP63B-1 | Chr6:6431584-6440230     | 4 | 1180-1400  | intronic   | <i>LY86-AS1</i> | LY86 antisense RNA 1<br>(non-protein coding)                      |                                                                                                                                                                                                                                                                                                                                                                                                                                                                                                                                                                                                                                                                                                                                                                         |                                                                                                                                                                                                                                                                                       | Fig. 5 and<br>Suppl. Fig. 6O |
| rs17826697 | 14 | 94207226  | deletion/<br>TP19-1  | Chr14:94203899-94208624  | 3 | 630-2000   | intergenic |                 |                                                                   |                                                                                                                                                                                                                                                                                                                                                                                                                                                                                                                                                                                                                                                                                                                                                                         |                                                                                                                                                                                                                                                                                       |                              |
| rs6928830  | 6  | 84276031  | deletion/<br>TP52B-2 | Chr6:84271686-84284694   | 3 | 530-810    | upstream   | <i>PRSS35</i>   | Protease, serine, 35                                              | GO:0006508 proteolysis                                                                                                                                                                                                                                                                                                                                                                                                                                                                                                                                                                                                                                                                                                                                                  |                                                                                                                                                                                                                                                                                       | Figs. 2H and 5               |
| rs12453531 | 17 | 21365866  | gain/<br>TP55B-2     | Chr17:21318609-21377374  | 3 | 3220-4760  | intergenic |                 |                                                                   |                                                                                                                                                                                                                                                                                                                                                                                                                                                                                                                                                                                                                                                                                                                                                                         |                                                                                                                                                                                                                                                                                       |                              |
| rs1923886  | 13 | 46321292  | deletion/<br>TP58B-1 | Chr13:46319637-46325827  | 2 | 350-1440   | intronic   | <i>HTR2A</i>    | 5-hydroxytryptamine 2A<br>receptor                                | GO:0007268 synaptic transmission<br>GO:0007568 aging<br>GO:0042127 regulation of cell proliferation<br>GO:0008219 cell death<br>GO:0010517 regulation of phospholipase activity<br>GO:0043269 regulation of ion transport<br>GO:0014059 regulation of dopamine secretion<br>GO:0019229 regulation of vasoconstriction<br>GO:0042493 response to drug<br>GO:0043405 regulation of MAP kinase activity<br>GO:0051174 regulation of phosphorus metabolic<br>process<br>GO:0051336 regulation of hydrolase activity<br>GO:0051338 regulation of transferase activity<br>GO:0051952 regulation of amine transport<br>GO:0051969 regulation of transmission of nerve<br>impulse<br>GO:0060191 regulation of lipase activity<br>GO:0060341 regulation of cellular localization | 581577: ADHD.<br>126748: Alzheimer's Disease.<br>126762: bulimia.<br>126755: depressive disorder.<br>126787: dyskinesia, Drug-Induced.<br>126750: irritable bowel syndrome<br>126718: obesity.<br>126801: panic disorder.<br>126752: personality disorders.<br>149274: schizophrenia. |                              |
| rs7042370  | 9  | 12775073  | gain/ TP20-1         | Chr9:12768071-12780701   | 2 | 1280-3800  | intronic   | <i>C9orf150</i> | Uncharacterized protein<br>C9orf150.                              |                                                                                                                                                                                                                                                                                                                                                                                                                                                                                                                                                                                                                                                                                                                                                                         |                                                                                                                                                                                                                                                                                       | Suppl. Fig. 6C               |
| rs10882097 | 10 | 82558664  | gain/ TP11-2         | Chr10:82556482-82562289  | 2 | 850-1670   | intergenic |                 |                                                                   |                                                                                                                                                                                                                                                                                                                                                                                                                                                                                                                                                                                                                                                                                                                                                                         |                                                                                                                                                                                                                                                                                       |                              |
| rs8105356  | 19 | 16917676  | deletion/<br>TP45B-1 | Chr19:16901972-16949112  | 2 | 8540-16150 | intronic   | <i>CPAMD8</i>   | C3 and PZP-like, alpha-2-<br>macroglobulin domain<br>containing 8 |                                                                                                                                                                                                                                                                                                                                                                                                                                                                                                                                                                                                                                                                                                                                                                         | 597349: Multiple Sclerosis.                                                                                                                                                                                                                                                           |                              |
| rs8046144  | 16 | 6239236   | deletion/<br>TP20-2  | Chr16:6237153-6242346    | 2 | 1190-1990  | intronic   | <i>A2BP1</i>    | Ataxin 2-binding protein<br>1                                     | GO:0006396 RNA processing<br>GO:0050658 RNA transport<br>GO:0006403 RNA localization                                                                                                                                                                                                                                                                                                                                                                                                                                                                                                                                                                                                                                                                                    | 600218: smoking cessation<br>(dependency).<br>596684: response to antipsychotic<br>therapy (extrapyramidal side effects).<br>586444: osteoarthritis.<br>596685: metabolic.<br>596686: ADHD and conduct disorder.                                                                      |                              |
| rs1431371  | 21 | 27971665  | gain/ TP28-2         | Chr21:27966875-27976776  | 2 | 420-1050   | intergenic |                 |                                                                   |                                                                                                                                                                                                                                                                                                                                                                                                                                                                                                                                                                                                                                                                                                                                                                         |                                                                                                                                                                                                                                                                                       |                              |
| rs1833183  | 16 | 54482257  | gain/ 030-02         | Chr16:54473902-54493838  | 2 | 1800-4500  | intergenic | <i>CES5A</i>    |                                                                   |                                                                                                                                                                                                                                                                                                                                                                                                                                                                                                                                                                                                                                                                                                                                                                         |                                                                                                                                                                                                                                                                                       |                              |
| rs2765283  | 1  | 118337941 | deletion/<br>TP28-2  | Chr1:118327915-118362606 | 1 | 610        | intronic   | <i>SPAG17</i>   | Sperm associated antigen<br>17                                    |                                                                                                                                                                                                                                                                                                                                                                                                                                                                                                                                                                                                                                                                                                                                                                         | 599725: influence on adult height.                                                                                                                                                                                                                                                    |                              |
| rs932562   | 20 | 33334724  | deletion/<br>TP45B-1 | Chr20:33330911-33348769  | 1 | 1620       | intronic   | <i>EIF6</i>     | Eukaryotic translation<br>initiation factor 6                     | GO:0042255 ribosome assembly                                                                                                                                                                                                                                                                                                                                                                                                                                                                                                                                                                                                                                                                                                                                            | 597519: influence on adult height.                                                                                                                                                                                                                                                    |                              |

|            |    |           |                      |                          |   |      |            |                  |                                                          |                                    |  |                |
|------------|----|-----------|----------------------|--------------------------|---|------|------------|------------------|----------------------------------------------------------|------------------------------------|--|----------------|
| rs4656703  | 1  | 167954759 | deletion/<br>TP44B-1 | Chr1:167942717-167963770 | 1 | 8600 | intergenic |                  |                                                          |                                    |  |                |
| rs9846423  | 3  | 115420025 | deletion/<br>TP19-1  | Chr3:115415098-115422134 | 1 | 1600 | intergenic |                  |                                                          |                                    |  |                |
| rs1991914  | 4  | 4260014   | gain/ 101A           | Chr4:4258067-4270691     | 1 | 1470 | intronic   | <i>OTOP1</i>     | Otopetrin 1                                              | GO:0043583 ear development         |  |                |
| rs4814335  | 20 | 15001067  | gain/ TP52B-2        | Chr20:14991423-15004875  | 1 | 1660 | intronic   | <i>MACROD2</i>   | MACRO domain containing 2 isoform 1                      |                                    |  |                |
| rs4276037  | 2  | 118821447 | gain/ 101A           | Chr2:118808614-118827516 | 1 | 260  | intergenic |                  |                                                          |                                    |  |                |
| rs7630157  | 3  | 169797194 | gain/ 127-02         | Chr3:169785772-169809517 | 1 | 200  | intronic   | <i>EGFEM1P</i>   | EGFEM1P EGF-like and EMI domain containing 1, pseudogene |                                    |  | Suppl. Fig. 6F |
| rs1535995  | 13 | 33883168  | deletion/<br>TP12-2  | Chr13:33880447-33892186  | 1 | 270  | intergenic |                  |                                                          |                                    |  |                |
| rs625525   | 1  | 91770181  | deletion/<br>TP19-1  | Chr1:91758870-91775350   | 1 | 5900 | intergenic |                  |                                                          |                                    |  |                |
| rs4722094  | 7  | 22098406  | deletion/<br>TP14-1  | Chr7:22097746-22104866   | 1 | 300  | intergenic |                  |                                                          |                                    |  |                |
| rs11145408 | 9  | 79191138  | deletion/<br>TP61B-2 | Chr9:79179573-79200947   | 1 | 1700 | intronic   | <i>VPS13A</i>    | Vacuolar protein sorting-associated protein 13A          | GO:0048193 Golgi vesicle transport |  |                |
| rs2823691  | 21 | 16548409  | deletion/<br>TP20-1  | Chr21:16540190-16553223  | 1 | 270  | intronic   | <i>LINC00478</i> |                                                          |                                    |  |                |

<sup>a</sup> - The chromosome segment indicated has been covered by a maximum density of overlapping oligonucleotide probes on the Nimblegen 135K custom array. The overall description of the Nimblegen validation array is provided in Supplemental Figure 6 and Materials and Methods.

<sup>b</sup> - Rows in this Table have been sorted based on the number of times a locus has been validated according to the Nimblegen array experiments, in descending order.

<sup>c</sup> - Range of sizes in base pairs is given when CNVs that were validated on Nimblegen array were not of identical sizes.



Table S5. PCR Primers Used in Real-Time PCR Validation Experiments

| Primer name  | Target chromosome | Chromosomal region of PCR product (bp) | Primer sequence (5' -> 3') |
|--------------|-------------------|----------------------------------------|----------------------------|
| UCE3 Forward | 3                 | 18819577-18819662                      | TGGTGCATTCAGTGACCAAA       |
| UCE3 Reverse | 3                 | 18819577-18819662                      | TCTCCAGGGACTGCCTTTATT      |
| UCE6 Forward | 6                 | 19666501-19666581                      | AGGAACAAAATTGGCACCAC       |
| UCE6 Reverse | 6                 | 19666501-19666581                      | GCAATTATGTGACTGCAGGGTA     |
| 41.1 Forward | 5                 | 110861950-110862042                    | GGGACATCCAGTTCAGGAAA       |
| 41.1 Reverse | 5                 | 110861950-110862042                    | TGAAATTCCAAAGGTGCCTAA      |
| 42.1 Forward | 5                 | 89845408-89845557                      | AAGTTGTCATTTGCGGTTGA       |
| 42.1 Reverse | 5                 | 89845408-89845557                      | CCTGGTTCAAGTGGTTATCTGC     |
| 45.1 Forward | 20                | 33999950-34000065                      | TCCCCACTACACGTAACAGT       |
| 45.1 Reverse | 20                | 33999950-34000065                      | GAGTGAGGCTGGGTTAGGTG       |
| 46.1 Forward | 20                | 30860119-30860266                      | CTTTGTGAACGGAAGGCAGT       |
| 46.1 Reverse | 20                | 30860119-30860266                      | CCCCACAGTCTCGACCTCTA       |
| rs540796     | 1                 | 55296756-55296871                      | GCAGGTTGGCAGCTGTTT         |
| rs540796     | 1                 | 55296756-55296871                      | AAACTGGAGCAGCTCAGCA        |
| rs9298462    | 8                 | 52908657-52908775                      | TGCCTCCAACTTTTAGTAATATTTT  |
| rs9298462    | 8                 | 52908657-52908775                      | TGTTGGTAATTGCCTCCAGA       |
| rs4635020    | 10                | 100702895-100703014                    | AAGAGAGCTGGGCTTCCTTC       |
| rs4635020    | 10                | 100702895-100703014                    | CACCGAGGAGAACACCAAAT       |
| rs6928830    | 6                 | 84275967-84276090                      | ACAGCCAAAGCAATTCAGGT       |
| rs6928830    | 6                 | 84275967-84276090                      | TCATGGAAATGTACTTGAAAGTT    |
| rs4841318    | 8                 | 10224548-10224700                      | CCCATAATCTGGTCTCCAA        |
| rs4841318    | 8                 | 10224548-10224700                      | AGTGTGTTCTGGGGTTCAGG       |
| rs329312     | 5                 | 133928329-133928408                    | GACTGGGGCCAGAGTCAGA        |
| rs329312     | 5                 | 133928329-133928408                    | GGGTCTGTTCCCACTCCCTA       |
| rs708039     | 6                 | 6432885-6433018                        | GGGAGAAGAGACACGCTTTG       |
| rs708039     | 6                 | 6432885-6433018                        | CTCCCTGAAGAGATGCCTGT       |

Positions of primers are according to NCBI36/hg18 genome assembly. UCE3 and UCE6 are Ultra Conserved Elements on chromosomes 3 and 6, respectively, which were used as controls.

Table S6. Median BAF Values of Heterozygous SNPs for Evaluation of Genotyping Quality on Illumina 1M-Duo and Illumina 550K Platform

| Cohort | ID  | Type of platform | Median BAF values of heterozygote SNPs (Standard deviation) |
|--------|-----|------------------|-------------------------------------------------------------|
| ULSAM  | 675 | 1M-Duo           | 0.5289 (0.04)                                               |
| ULSAM  | 442 | 1M-Duo           | 0.5229 (0.0427)                                             |
| ULSAM  | 445 | 1M-Duo           | 0.5184 (0.0386)                                             |
| ULSAM  | 627 | 1M-Duo           | 0.5192 (0.0404)                                             |
| ULSAM  | 506 | 1M-Duo           | 0.5289 (0.0431)                                             |
| ULSAM  | 261 | 1M-Duo           | 0.4968 (0.0497)                                             |
| ULSAM  | 622 | 1M-Duo           | 0.5234 (0.0439)                                             |
| ULSAM  | 397 | 1M-Duo           | 0.5306 (0.0471)                                             |
| ULSAM  | 333 | 1M-Duo           | 0.5232 (0.041)                                              |
| ULSAM  | 296 | 1M-Duo           | 0.5242 (0.0447)                                             |
| ULSAM  | 504 | 1M-Duo           | 0.5255 (0.0486)                                             |
| ULSAM  | 555 | 1M-Duo           | 0.5251 (0.043)                                              |
| ULSAM  | 474 | 1M-Duo           | 0.5272 (0.0472)                                             |
| ULSAM  | 420 | 1M-Duo           | 0.519 (0.0402)                                              |
| ULSAM  | 63  | 1M-Duo           | 0.5226 (0.0459)                                             |
| ULSAM  | 639 | 1M-Duo           | 0.5248 (0.0417)                                             |
| ULSAM  | 32  | 1M-Duo           | 0.5156 (0.0394)                                             |
| ULSAM  | 523 | 1M-Duo           | 0.497 (0.0444)                                              |
| ULSAM  | 102 | 1M-Duo           | 0.4972 (0.047)                                              |
| ULSAM  | 41  | 1M-Duo           | 0.5285 (0.0458)                                             |
| ULSAM  | 373 | 1M-Duo           | 0.5277 (0.0429)                                             |
| ULSAM  | 342 | 1M-Duo           | 0.5263 (0.0505)                                             |
| ULSAM  | 91  | 1M-Duo           | 0.4989 (0.048)                                              |
| ULSAM  | 364 | 1M-Duo           | 0.5235 (0.0391)                                             |
| ULSAM  | 664 | 1M-Duo           | 0.5275 (0.0466)                                             |
| ULSAM  | 456 | 1M-Duo           | 0.5305 (0.041)                                              |
| ULSAM  | 648 | 1M-Duo           | 0.5245 (0.0479)                                             |
| ULSAM  | 73  | 1M-Duo           | 0.527 (0.0455)                                              |
| ULSAM  | 418 | 1M-Duo           | 0.5179 (0.0392)                                             |
| ULSAM  | 312 | 1M-Duo           | 0.5267 (0.0414)                                             |
| ULSAM  | 349 | 1M-Duo           | 0.5253 (0.0402)                                             |
| ULSAM  | 211 | 1M-Duo           | 0.5222 (0.047)                                              |
| ULSAM  | 123 | 1M-Duo           | 0.5256 (0.0478)                                             |
| ULSAM  | 174 | 1M-Duo           | 0.5238 (0.0464)                                             |
| ULSAM  | 521 | 1M-Duo           | 0.5212 (0.0478)                                             |
| ULSAM  | 300 | 1M-Duo           | 0.5266 (0.0425)                                             |
| ULSAM  | 576 | 1M-Duo           | 0.5311 (0.0478)                                             |
| ULSAM  | 696 | 1M-Duo           | 0.5271 (0.0473)                                             |
| ULSAM  | 241 | 1M-Duo           | 0.532 (0.0465)                                              |
| ULSAM  | 711 | 1M-Duo           | 0.5252 (0.047)                                              |
| ULSAM  | 95  | 1M-Duo           | 0.525 (0.038)                                               |

|       |     |        |                 |
|-------|-----|--------|-----------------|
| ULSAM | 697 | 1M-Duo | 0.5255 (0.0462) |
| ULSAM | 621 | 1M-Duo | 0.5249 (0.0442) |
| ULSAM | 498 | 1M-Duo | 0.4953 (0.051)  |
| ULSAM | 620 | 1M-Duo | 0.5268 (0.0501) |
| ULSAM | 681 | 1M-Duo | 0.5241 (0.052)  |
| ULSAM | 152 | 1M-Duo | 0.5186 (0.0385) |
| ULSAM | 549 | 1M-Duo | 0.5228 (0.0478) |
| ULSAM | 355 | 1M-Duo | 0.5259 (0.0474) |
| ULSAM | 207 | 1M-Duo | 0.4991 (0.0499) |
| ULSAM | 254 | 1M-Duo | 0.5271 (0.0453) |
| ULSAM | 729 | 1M-Duo | 0.5279 (0.0422) |
| ULSAM | 38  | 1M-Duo | 0.5224 (0.0441) |
| ULSAM | 434 | 1M-Duo | 0.5206 (0.0389) |
| ULSAM | 487 | 1M-Duo | 0.496 (0.0429)  |
| ULSAM | 114 | 1M-Duo | 0.5223 (0.0381) |
| ULSAM | 674 | 1M-Duo | 0.5239 (0.0472) |
| ULSAM | 209 | 1M-Duo | 0.5279 (0.0419) |
| ULSAM | 346 | 1M-Duo | 0.5268 (0.04)   |
| ULSAM | 597 | 1M-Duo | 0.5269 (0.0405) |
| ULSAM | 634 | 1M-Duo | 0.5233 (0.0395) |
| ULSAM | 735 | 1M-Duo | 0.5263 (0.0428) |
| ULSAM | 514 | 1M-Duo | 0.4965 (0.046)  |
| ULSAM | 23  | 1M-Duo | 0.5269 (0.0465) |
| ULSAM | 381 | 1M-Duo | 0.5184 (0.0366) |
| ULSAM | 411 | 1M-Duo | 0.5277 (0.0407) |
| ULSAM | 48  | 1M-Duo | 0.4981 (0.0488) |
| ULSAM | 579 | 1M-Duo | 0.5229 (0.0455) |
| ULSAM | 462 | 1M-Duo | 0.4982 (0.0502) |
| ULSAM | 321 | 1M-Duo | 0.5254 (0.0377) |
| ULSAM | 318 | 1M-Duo | 0.524 (0.0422)  |
| ULSAM | 590 | 1M-Duo | 0.5276 (0.0396) |
| ULSAM | 686 | 1M-Duo | 0.5258 (0.0438) |
| ULSAM | 452 | 1M-Duo | 0.5207 (0.0376) |
| ULSAM | 298 | 1M-Duo | 0.531 (0.0613)  |
| ULSAM | 2   | 1M-Duo | 0.5299 (0.0462) |
| ULSAM | 606 | 1M-Duo | 0.5285 (0.0409) |
| ULSAM | 351 | 1M-Duo | 0.5242 (0.0413) |
| ULSAM | 547 | 1M-Duo | 0.5332 (0.0474) |
| ULSAM | 524 | 1M-Duo | 0.5296 (0.0507) |
| ULSAM | 80  | 1M-Duo | 0.498 (0.0461)  |
| ULSAM | 649 | 1M-Duo | 0.5227 (0.0453) |
| ULSAM | 465 | 1M-Duo | 0.5277 (0.0457) |
| ULSAM | 449 | 1M-Duo | 0.5208 (0.0389) |
| ULSAM | 512 | 1M-Duo | 0.5222 (0.0465) |
| ULSAM | 687 | 1M-Duo | 0.5282 (0.0437) |
| ULSAM | 117 | 1M-Duo | 0.5254 (0.0508) |

|         |        |        |                 |
|---------|--------|--------|-----------------|
| ULSAM   | 419    | 1M-Duo | 0.4983 (0.0513) |
| ULSAM   | 377    | 1M-Duo | 0.5262 (0.0401) |
| ULSAM   | 631    | 1M-Duo | 0.5176 (0.0408) |
| ULSAM   | 311    | 1M-Duo | 0.5199 (0.042)  |
| ULSAM   | 408    | 1M-Duo | 0.5266 (0.04)   |
| ULSAM   | 379    | 1M-Duo | 0.5297 (0.0434) |
| ULSAM   | 569    | 1M-Duo | 0.5239 (0.042)  |
| ULSAM   | 171    | 1M-Duo | 0.5241 (0.0415) |
| ULSAM   | 9      | 1M-Duo | 0.4968 (0.0476) |
| ULSAM   | 340    | 1M-Duo | 0.5278 (0.04)   |
| ULSAM   | 43     | 1M-Duo | 0.5186 (0.0382) |
| ULSAM   | 153    | 1M-Duo | 0.5264 (0.0496) |
| ULSAM   | 668    | 1M-Duo | 0.5176 (0.038)  |
| ULSAM   | 716    | 1M-Duo | 0.5241 (0.0397) |
| ULSAM   | 708    | 1M-Duo | 0.5222 (0.0492) |
| ULSAM   | 59     | 1M-Duo | 0.5222 (0.0455) |
| ULSAM   | 632    | 1M-Duo | 0.5286 (0.0418) |
| ULSAM   | 554    | 1M-Duo | 0.5274 (0.0416) |
| ULSAM   | 421    | 1M-Duo | 0.5307 (0.0407) |
| ULSAM   | 409    | 1M-Duo | 0.5308 (0.0519) |
| ULSAM   | 359    | 1M-Duo | 0.5288 (0.0497) |
| ADVANCE | R02131 | 550K   | 0.5079 (0.0333) |
| ADVANCE | R02150 | 550K   | 0.5045 (0.0363) |
| ADVANCE | R02161 | 550K   | 0.509 (0.0327)  |
| ADVANCE | R02167 | 550K   | 0.5107 (0.0302) |
| ADVANCE | R02169 | 550K   | 0.504 (0.0323)  |
| ADVANCE | R02178 | 550K   | 0.5145 (0.0376) |
| ADVANCE | R02179 | 550K   | 0.5063 (0.0358) |
| ADVANCE | R02180 | 550K   | 0.5126 (0.0384) |
| ADVANCE | R02182 | 550K   | 0.5061 (0.0343) |
| ADVANCE | R02190 | 550K   | 0.4995 (0.0335) |
| ADVANCE | R02192 | 550K   | 0.4978 (0.0308) |
| ADVANCE | R02193 | 550K   | 0.5038 (0.0323) |
| ADVANCE | R02202 | 550K   | 0.501 (0.0285)  |
| ADVANCE | R02203 | 550K   | 0.504 (0.0295)  |
| ADVANCE | R02219 | 550K   | 0.5061 (0.0335) |
| ADVANCE | R02223 | 550K   | 0.5083 (0.0315) |
| ADVANCE | R02232 | 550K   | 0.5118 (0.0324) |
| ADVANCE | R02236 | 550K   | 0.5087 (0.0325) |
| ADVANCE | R02237 | 550K   | 0.499 (0.0306)  |
| ADVANCE | R02242 | 550K   | 0.5006 (0.0305) |
| ADVANCE | R02254 | 550K   | 0.5122 (0.0318) |
| ADVANCE | R02257 | 550K   | 0.5114 (0.0315) |
| ADVANCE | R02262 | 550K   | 0.5075 (0.0308) |
| ADVANCE | R02276 | 550K   | 0.511 (0.0328)  |
| ADVANCE | R02280 | 550K   | 0.5088 (0.0345) |

|         |        |      |                 |
|---------|--------|------|-----------------|
| ADVANCE | R02286 | 550K | 0.5095 (0.0321) |
| ADVANCE | R02290 | 550K | 0.5144 (0.0323) |
| ADVANCE | R02294 | 550K | 0.511 (0.0391)  |
| ADVANCE | R02295 | 550K | 0.5171 (0.0338) |
| ADVANCE | R02296 | 550K | 0.513 (0.0332)  |
| ADVANCE | R02300 | 550K | 0.5057 (0.0333) |
| ADVANCE | R02313 | 550K | 0.5103 (0.0321) |
| ADVANCE | R02314 | 550K | 0.5105 (0.0301) |
| ADVANCE | R02315 | 550K | 0.508 (0.031)   |
| ADVANCE | R02322 | 550K | 0.5068 (0.0297) |
| ADVANCE | R02332 | 550K | 0.5138 (0.0358) |
| ADVANCE | R02362 | 550K | 0.5099 (0.0309) |
| ADVANCE | R02367 | 550K | 0.5149 (0.0332) |
| ADVANCE | R02382 | 550K | 0.506 (0.027)   |
| ADVANCE | R02394 | 550K | 0.5051 (0.0294) |
| ADVANCE | R02423 | 550K | 0.5184 (0.0329) |
| ADVANCE | R02459 | 550K | 0.5054 (0.0348) |
| ADVANCE | R02537 | 550K | 0.5149 (0.0309) |
| ADVANCE | R02539 | 550K | 0.5156 (0.0386) |
| ADVANCE | R02549 | 550K | 0.5112 (0.0316) |
| ADVANCE | R02556 | 550K | 0.5081 (0.0289) |
| ADVANCE | R02578 | 550K | 0.5098 (0.0307) |
| ADVANCE | R02601 | 550K | 0.5284 (0.0352) |
| ADVANCE | R02648 | 550K | 0.5117 (0.0336) |
| ADVANCE | R02714 | 550K | 0.5066 (0.029)  |
| ADVANCE | R02788 | 550K | 0.5113 (0.0324) |
| ADVANCE | R02929 | 550K | 0.5155 (0.0344) |
| ADVANCE | R02941 | 550K | 0.5086 (0.0329) |
| ADVANCE | R02952 | 550K | 0.5143 (0.0332) |
| ADVANCE | R02986 | 550K | 0.5105 (0.0345) |
| ADVANCE | R02987 | 550K | 0.5121 (0.0315) |
| ADVANCE | R02988 | 550K | 0.5051 (0.0314) |
| ADVANCE | R02989 | 550K | 0.5081 (0.0328) |
| ADVANCE | R03004 | 550K | 0.5111 (0.0355) |
| ADVANCE | R03011 | 550K | 0.5142 (0.0339) |
| ADVANCE | R03013 | 550K | 0.5113 (0.0347) |
| ADVANCE | R03015 | 550K | 0.5143 (0.0342) |
| ADVANCE | R03026 | 550K | 0.5072 (0.033)  |
| ADVANCE | R03027 | 550K | 0.5087 (0.0337) |
| ADVANCE | R03043 | 550K | 0.5097 (0.0339) |
| ADVANCE | R03052 | 550K | 0.5046 (0.0296) |
| ADVANCE | R03054 | 550K | 0.5036 (0.0291) |
| ADVANCE | R03071 | 550K | 0.5074 (0.0334) |
| ADVANCE | R03073 | 550K | 0.5088 (0.0394) |
| ADVANCE | R03085 | 550K | 0.5007 (0.0332) |
| ADVANCE | R03087 | 550K | 0.505 (0.0376)  |

|         |        |      |                 |
|---------|--------|------|-----------------|
| ADVANCE | R03092 | 550K | 0.5051 (0.0418) |
| ADVANCE | RC9003 | 550K | 0.5036 (0.0362) |
| ADVANCE | RC9005 | 550K | 0.4923 (0.0418) |
| ADVANCE | RC9012 | 550K | 0.5074 (0.0321) |
| ADVANCE | RC9013 | 550K | 0.4957 (0.0304) |
| ADVANCE | RC9014 | 550K | 0.4932 (0.0313) |
| ADVANCE | RC9018 | 550K | 0.4997 (0.0357) |
| ADVANCE | RC9025 | 550K | 0.4935 (0.0341) |
| ADVANCE | RC9031 | 550K | 0.4995 (0.0273) |
| ADVANCE | RC9032 | 550K | 0.5052 (0.0288) |
| ADVANCE | RC9033 | 550K | 0.5072 (0.0313) |
| ADVANCE | RC9035 | 550K | 0.5043 (0.03)   |
| ADVANCE | RC9036 | 550K | 0.497 (0.0314)  |
| ADVANCE | RC9037 | 550K | 0.5034 (0.0305) |
| ADVANCE | RC9041 | 550K | 0.5042 (0.0318) |
| ADVANCE | RC9042 | 550K | 0.4948 (0.0271) |
| ADVANCE | RC9043 | 550K | 0.4932 (0.0258) |
| ADVANCE | RC9045 | 550K | 0.4987 (0.0294) |
| ADVANCE | RC9046 | 550K | 0.5092 (0.0329) |
| ADVANCE | RC9047 | 550K | 0.5045 (0.0298) |
| ADVANCE | RC9050 | 550K | 0.5018 (0.029)  |
| ADVANCE | RC9051 | 550K | 0.4982 (0.0255) |
| ADVANCE | RC9054 | 550K | 0.5012 (0.0271) |
| ADVANCE | RC9055 | 550K | 0.5011 (0.03)   |
| ADVANCE | RC9056 | 550K | 0.5085 (0.031)  |
| ADVANCE | RC9058 | 550K | 0.505 (0.0312)  |
| ADVANCE | RC9067 | 550K | 0.5048 (0.0297) |
| ADVANCE | RC9068 | 550K | 0.4993 (0.0298) |
| ADVANCE | RC9069 | 550K | 0.499 (0.03)    |
| ADVANCE | RC9074 | 550K | 0.4996 (0.0292) |
| ADVANCE | RC9075 | 550K | 0.5067 (0.0343) |
| ADVANCE | RC9081 | 550K | 0.5051 (0.0346) |
| ADVANCE | RC9083 | 550K | 0.506 (0.0324)  |
| ADVANCE | RC9085 | 550K | 0.5017 (0.0278) |
| ADVANCE | RC9086 | 550K | 0.5046 (0.0324) |
| ADVANCE | RC9088 | 550K | 0.4986 (0.0267) |
| ADVANCE | RC9089 | 550K | 0.5027 (0.0276) |
| ADVANCE | RC9090 | 550K | 0.4985 (0.0317) |
| ADVANCE | RC9096 | 550K | 0.4981 (0.0272) |
| ADVANCE | RC9101 | 550K | 0.5117 (0.0327) |
| ADVANCE | RC9105 | 550K | 0.5021 (0.0348) |
| ADVANCE | RC9106 | 550K | 0.511 (0.0335)  |
| ADVANCE | RC9107 | 550K | 0.5014 (0.0283) |
| ADVANCE | RC9108 | 550K | 0.5058 (0.0296) |
| ADVANCE | RC9113 | 550K | 0.5 (0.0294)    |
| ADVANCE | RC9114 | 550K | 0.5017 (0.0281) |

|         |        |      |                 |
|---------|--------|------|-----------------|
| ADVANCE | RC9116 | 550K | 0.5028 (0.0278) |
| ADVANCE | RC9117 | 550K | 0.502 (0.0284)  |
| ADVANCE | RC9118 | 550K | 0.5001 (0.027)  |
| ADVANCE | RC9122 | 550K | 0.4978 (0.0252) |
| ADVANCE | RC9125 | 550K | 0.4951 (0.0267) |
| ADVANCE | RC9126 | 550K | 0.4742 (0.0323) |
| ADVANCE | RC9130 | 550K | 0.5029 (0.0303) |
| ADVANCE | RC9131 | 550K | 0.5046 (0.0312) |
| ADVANCE | RC9140 | 550K | 0.503 (0.0369)  |
| ADVANCE | RC9142 | 550K | 0.4999 (0.0296) |
| ADVANCE | RC9143 | 550K | 0.5041 (0.0374) |
| ADVANCE | RC9144 | 550K | 0.5044 (0.0298) |
| ADVANCE | RC9151 | 550K | 0.4931 (0.0302) |
| ADVANCE | RC9153 | 550K | 0.4944 (0.0274) |
| ADVANCE | RC9155 | 550K | 0.5042 (0.029)  |
| ADVANCE | RC9163 | 550K | 0.5039 (0.0333) |
| ADVANCE | RC9164 | 550K | 0.5012 (0.0309) |
| ADVANCE | RC9165 | 550K | 0.5047 (0.0315) |
| ADVANCE | RC9166 | 550K | 0.5023 (0.0295) |
| ADVANCE | RC9168 | 550K | 0.4965 (0.0298) |
| ADVANCE | RC9169 | 550K | 0.4973 (0.0345) |
| ADVANCE | RC9176 | 550K | 0.4949 (0.0288) |
| ADVANCE | RC9184 | 550K | 0.4941 (0.0241) |
| ADVANCE | RC9189 | 550K | 0.5037 (0.0316) |
| ADVANCE | RC9192 | 550K | 0.4959 (0.0311) |
| ADVANCE | RC9196 | 550K | 0.5108 (0.0305) |
| ADVANCE | RC9201 | 550K | 0.5 (0.0345)    |
| ADVANCE | RC9204 | 550K | 0.503 (0.029)   |
| ADVANCE | RC9205 | 550K | 0.5064 (0.0316) |
| ADVANCE | RC9207 | 550K | 0.5071 (0.0328) |
| ADVANCE | RC9210 | 550K | 0.5015 (0.0298) |
| ADVANCE | RC9215 | 550K | 0.5037 (0.034)  |
| ADVANCE | RC9216 | 550K | 0.5034 (0.0318) |
| ADVANCE | RC9217 | 550K | 0.5065 (0.0302) |
| ADVANCE | RC9225 | 550K | 0.5051 (0.0305) |
| ADVANCE | RC9230 | 550K | 0.5017 (0.0355) |
| ADVANCE | RC9243 | 550K | 0.498 (0.0307)  |
| ADVANCE | RC9248 | 550K | 0.4982 (0.031)  |
| ADVANCE | RC9250 | 550K | 0.4943 (0.0321) |
| ADVANCE | RC9252 | 550K | 0.5121 (0.0362) |
| ADVANCE | RC9257 | 550K | 0.5028 (0.0361) |
| ADVANCE | RC9258 | 550K | 0.5064 (0.0388) |
| ADVANCE | RC9259 | 550K | 0.4991 (0.034)  |
| ADVANCE | RC9263 | 550K | 0.5009 (0.0312) |
| ADVANCE | RC9264 | 550K | 0.4963 (0.0346) |
| ADVANCE | RC9290 | 550K | 0.5035 (0.0291) |

|         |        |      |                 |
|---------|--------|------|-----------------|
| ADVANCE | RC9294 | 550K | 0.5082 (0.0314) |
| ADVANCE | RC9302 | 550K | 0.5022 (0.0363) |
| ADVANCE | RC9306 | 550K | 0.4983 (0.0287) |
| ADVANCE | RC9307 | 550K | 0.4945 (0.0374) |
| ADVANCE | RC9335 | 550K | 0.5 (0.0354)    |
| ADVANCE | RC9338 | 550K | 0.5025 (0.0322) |
| ADVANCE | RC9341 | 550K | 0.5034 (0.0358) |
| ADVANCE | RC9349 | 550K | 0.4944 (0.0303) |
| ADVANCE | RC9350 | 550K | 0.4968 (0.0371) |
| ADVANCE | RC9353 | 550K | 0.4959 (0.0358) |
| ADVANCE | RC9373 | 550K | 0.5073 (0.0323) |
| ADVANCE | RC9374 | 550K | 0.5031 (0.0295) |
| ADVANCE | RC9380 | 550K | 0.4988 (0.032)  |
| ADVANCE | RC9386 | 550K | 0.4938 (0.0311) |
| ADVANCE | RC9475 | 550K | 0.4937 (0.0324) |
| ADVANCE | RC9477 | 550K | 0.4865 (0.0314) |
| ADVANCE | RC9478 | 550K | 0.4923 (0.0358) |



Table S7. Summary of Genome-Wide Divergence of MZ Co-Twins Derived from Small-Scale *de novo* CNVs that Were Validated on Nimblegen Array

| MZ twin PairID / cohort  | Age        | Number of validated loci on the 135K array | Total size of all loci validated with the 135K array (bp) | Estimated genome-wide CNV divergence between MZ co-twins (%) |
|--------------------------|------------|--------------------------------------------|-----------------------------------------------------------|--------------------------------------------------------------|
| TP52B / KI-SATSA         | 78         | 32                                         | 51040                                                     | 0.00001646                                                   |
| TP31 / KI-SATSA          | 69         | 20                                         | 32270                                                     | 0.00001040                                                   |
| 127_X / NIH - Autoimmune | 11         | 13                                         | 31700                                                     | 0.00001022                                                   |
| 086_X / NIH - Autoimmune | 6          | 18                                         | 27590                                                     | 0.00000889                                                   |
| 126X / Univ. Washington  | 19         | 13                                         | 24860                                                     | 0.00000801                                                   |
| TP28 / KI-SATSA          | 74         | 18                                         | 23470                                                     | 0.00000757                                                   |
| TP20 / KI-SATSA          | 75         | 20                                         | 18960                                                     | 0.00000611                                                   |
| TP66B / KI-SATSA         | 75         | 18                                         | 18560                                                     | 0.00000598                                                   |
| TP45B / KI-SATSA         | 82         | 4                                          | 14810                                                     | 0.00000477                                                   |
| TP21 / KI-SATSA          | 71         | 8                                          | 11850                                                     | 0.00000382                                                   |
| TP5 / KI-SATSA           | 81         | 7                                          | 10820                                                     | 0.00000349                                                   |
| TP64B / KI-SATSA         | 76         | 1                                          | 10620                                                     | 0.00000342                                                   |
| TP16 / KI-SATSA          | 77         | 7                                          | 9130                                                      | 0.00000294                                                   |
| TP11 / KI-SATSA          | 78         | 7                                          | 7450                                                      | 0.00000240                                                   |
| 030_X / NIH - Autoimmune | 35         | 9                                          | 7060                                                      | 0.00000228                                                   |
| TP26 / KI-SATSA          | 72         | 5                                          | 5320                                                      | 0.00000172                                                   |
| TP63B / KI-SATSA         | 76         | 6                                          | 4670                                                      | 0.00000151                                                   |
| TP37 / KI-SATSA          | 64         | 7                                          | 3880                                                      | 0.00000125                                                   |
| TP33 / KI-SATSA          | 67         | 3                                          | 3690                                                      | 0.00000119                                                   |
| TP19 / KI-SATSA          | 75         | 4                                          | 3230                                                      | 0.00000104                                                   |
| 004_X / NIH - Autoimmune | 43         | 6                                          | 2600                                                      | 0.00000084                                                   |
| 151_X / NIH - Autoimmune | 6          | 3                                          | 2590                                                      | 0.00000084                                                   |
| TP3 / KI-SATSA           | 86         | 3                                          | 2390                                                      | 0.00000077                                                   |
| TP42 / KI-SATSA          | 68         | 2                                          | 1980                                                      | 0.00000064                                                   |
| TP51A / KI-SATSA         | 68         | 2                                          | 1960                                                      | 0.00000063                                                   |
| TP61B / KI-SATSA         | 61         | 3                                          | 1190                                                      | 0.00000038                                                   |
| TP48B / KI-SATSA         | 80         | 1                                          | 1170                                                      | 0.00000038                                                   |
| TP34 / KI-SATSA          | 65         | 2                                          | 730                                                       | 0.00000024                                                   |
| 130X / Univ. Washington  | 26         | 2                                          | 630                                                       | 0.00000020                                                   |
| TP9 / KI-SATSA           | 78         | 1                                          | 270                                                       | 0.00000009                                                   |
| TP29 / KI-SATSA          | 70         | 1                                          | 270                                                       | 0.00000009                                                   |
| TP13 / KI-SATSA          | 77         | 1                                          | 240                                                       | 0.00000008                                                   |
|                          | media<br>n | 6                                          | 4995                                                      | 0.00000161                                                   |

The table is sorted after the total combined size of loci that were differing between MZ co-twins on the 135K array. The percentage was calculated using a total genome size of 3,101,788,170 bp (<http://www.ncbi.nlm.nih.gov/projects/genome/assembly/grc/human/data/?build=37>).

The total of 34 MZ pairs were included in the validation experiments. For two of these pairs, none of the loci were validated.

Table S8. Age and Genotyping Quality of 18 MZ Twin Pairs in Longitudinal Analyses

| Cohort   | Twin pair ID | Twins age at sampling A | Twins age at sampling B | Genotyping quality twin 1 sampling A | Genotyping quality twin 2 sampling A | Genotyping quality twin 1 sampling B | Genotyping quality twin 2 sampling B | Difference in genotyping quality between twin 1 and 2 at sampling A | Difference in genotyping quality between twin 1 and 2 at sampling B | Difference in genotyping quality in twin 1 at samplings A and B | Difference in genotyping quality in twin 2 at samplings A and B |
|----------|--------------|-------------------------|-------------------------|--------------------------------------|--------------------------------------|--------------------------------------|--------------------------------------|---------------------------------------------------------------------|---------------------------------------------------------------------|-----------------------------------------------------------------|-----------------------------------------------------------------|
| KI-SATSA | TP43         | 72.0                    | 82.4                    | 0.06                                 | 0.06                                 | 0.05                                 | 0.05                                 | 0.01                                                                | 0.00                                                                | 0.01                                                            | 0.01                                                            |
| KI-SATSA | TP44         | 72.7                    | 82.7                    | 0.06                                 | 0.05                                 | 0.05                                 | 0.05                                 | 0.00                                                                | 0.00                                                                | 0.00                                                            | 0.00                                                            |
| KI-SATSA | TP45         | 72.6                    | 82.4                    | 0.08                                 | 0.07                                 | 0.07                                 | 0.07                                 | 0.02                                                                | 0.00                                                                | 0.01                                                            | 0.00                                                            |
| KI-SATSA | TP47         | 71.1                    | 80.8                    | 0.07                                 | 0.06                                 | 0.07                                 | 0.06                                 | 0.01                                                                | 0.01                                                                | 0.00                                                            | 0.00                                                            |
| KI-SATSA | TP48         | 69.9                    | 79.8                    | 0.05                                 | 0.06                                 | 0.05                                 | 0.05                                 | 0.00                                                                | 0.00                                                                | 0.00                                                            | 0.00                                                            |
| KI-SATSA | TP50         | 68.6                    | 78.6                    | 0.05                                 | 0.05                                 | 0.05                                 | 0.05                                 | 0.00                                                                | 0.01                                                                | 0.00                                                            | 0.00                                                            |
| KI-SATSA | TP52         | 68.3                    | 78.0                    | 0.08                                 | 0.06                                 | 0.06                                 | 0.06                                 | 0.01                                                                | 0.00                                                                | 0.01                                                            | 0.00                                                            |
| KI-SATSA | TP53         | 66.2                    | 76.2                    | 0.08                                 | 0.06                                 | 0.06                                 | 0.06                                 | 0.02                                                                | 0.01                                                                | 0.02                                                            | 0.01                                                            |
| KI-SATSA | TP55         | 55.3                    | 65.3                    | 0.05                                 | 0.05                                 | 0.06                                 | 0.05                                 | 0.00                                                                | 0.00                                                                | 0.01                                                            | 0.01                                                            |
| KI-SATSA | TP56         | 56.3                    | 66.2                    | 0.06                                 | 0.05                                 | 0.05                                 | 0.05                                 | 0.01                                                                | 0.01                                                                | 0.01                                                            | 0.01                                                            |
| KI-SATSA | TP57         | 55.1                    | 65.2                    | 0.04                                 | 0.04                                 | 0.05                                 | 0.04                                 | 0.00                                                                | 0.01                                                                | 0.01                                                            | 0.00                                                            |
| KI-SATSA | TP58         | 54.5                    | 64.4                    | 0.04                                 | 0.04                                 | 0.04                                 | 0.03                                 | 0.00                                                                | 0.00                                                                | 0.00                                                            | 0.00                                                            |
| KI-SATSA | TP60         | 52.6                    | 62.6                    | 0.03                                 | 0.03                                 | 0.03                                 | 0.03                                 | 0.00                                                                | 0.00                                                                | 0.00                                                            | 0.00                                                            |
| KI-SATSA | TP61         | 50.7                    | 60.7                    | 0.07                                 | 0.06                                 | 0.06                                 | 0.05                                 | 0.01                                                                | 0.01                                                                | 0.01                                                            | 0.01                                                            |
| KI-SATSA | TP62         | 65.8                    | 75.7                    | 0.06                                 | 0.06                                 | 0.05                                 | 0.05                                 | 0.00                                                                | 0.00                                                                | 0.01                                                            | 0.01                                                            |
| KI-SATSA | TP64         | 65.9                    | 75.9                    | 0.06                                 | 0.06                                 | 0.07                                 | 0.06                                 | 0.01                                                                | 0.01                                                                | 0.01                                                            | 0.00                                                            |
| KI-SATSA | TP66         | 65.3                    | 75.1                    | 0.05                                 | 0.05                                 | 0.05                                 | 0.07                                 | 0.00                                                                | 0.02                                                                | 0.01                                                            | 0.02                                                            |
| KI-SATSA | TP67         | 65.8                    | 75.8                    | 0.04                                 | 0.04                                 | 0.04                                 | 0.04                                 | 0.00                                                                | 0.00                                                                | 0.00                                                            | 0.00                                                            |

Samples collected in the first sampling are denoted as "A" and samples from the second sampling 10 years later are referred to as "B". Genotyping quality was calculated by the Nexus 5 software (Biodiscovery, Inc. CA, USA). Quality criteria for inclusion of pairs in the analysis; NQ < 0.1 for all individuals and maximum NQ difference within pairs of 0.02.
